# Supplementary material for: The InBIO barcoding initiative database: DNA barcodes of Iberian Trichoptera, documenting biodiversity for freshwater biomonitoring in a Mediterranean hotspot
Source: Biodivers Data J. 2023 Jan 19;11:e97484. doi: 10.3897/BDJ.11.e97484 (PMC10848855; doi:10.3897/BDJ.11.e97484)
Supplement: Supplementary material 3 — Genetic Distances [file bdj-11-e97484-s003.xlsx]

## Sheet: Table SM 2
Supplementary material 2 - Genetic Distances
Description. Estimates of average genetic divergence (uncorrected p-distances) for species of Trichoptera. Values under the diagonal refer to interspecifc divergence while values in the diagonal represent intraspecifc divergence.
Authors: Joana Paupério, Luis Martín, Sónia Ferreira, Jesús Martínez, Marcus A. González, Filipa M.S. Martins, Joana Veríssimo, Pamela Puppo, Joana C. Pinto, Cátia Chaves, Catarina Pinho, José Manuel Grosso-Silva, Lorenzo Quaglietta, Pedro Sousa, Ana Filipa Filipe, Paulo Célio Alves, Nuno Fonseca, Pedro Beja
Order	Family	TAXA	Apatania theischingerorum	Beraea alva	Beraea malatebrera	Micrasema cenerentola	Micrasema longulum	Micrasema minimum	Micrasema moestum	Micrasema servatum	Calamoceras marsupus	Ecnomus deceptor	Agapetus delicatulus	Agapetus fuscipes	Agapetus incertulus	Agapetus nimbulus	Agapetus ochripes	Agapetus segovicus	Agapetus theischingeri	Catagapetus maclachlani	Glossosoma privatum	Synagapetus diversus	Synagapetus lusitanicus	Larcasia partita	Silo graellsii	Helicopsyche lusitanica	Helicopsyche sp.	Cheumatopsyche lepida	Diplectrona felix	Hydropsyche ambigua	Hydropsyche brevis	Hydropsyche bulbifera	Hydropsyche dinarica	Hydropsyche exocellata	Hydropsyche iberomaroccana	Hydropsyche infernalis	Hydropsyche instabilis	Hydropsyche lobata	Hydropsyche pictetorum	Hydropsyche siltalai	Hydropsyche tenuis	Hydropsyche tibialis	Agraylea sexmaculata	Hydroptila fuentaldeala	Ithytrichia clavata	Oxyethira frici	Lepidostoma hirtum	Adicella meridionalis	Adicella reducta
Order	Apataniidae	Apatania theischingerorum	n/c
Trichoptera	Beraeidae	Beraea alva	0.191489	n/c
Trichoptera	Beraeidae	Beraea malatebrera	0.212006	0.1269	0.00151976
Trichoptera	Brachycentridae	Micrasema cenerentola	0.182371	0.211246	0.231763	n/c
Trichoptera	Brachycentridae	Micrasema longulum	0.164134	0.194529	0.190729	0.113982	n/c
Trichoptera	Brachycentridae	Micrasema minimum	0.155775	0.192249	0.193009	0.120821	0.119301	0.00151976
Trichoptera	Brachycentridae	Micrasema moestum	0.175279	0.202634	0.204914	0.133232	0.132725	0.0904255	0.00202634
Trichoptera	Brachycentridae	Micrasema servatum	0.174772	0.212766	0.209726	0.132219	0.112462	0.129939	0.135258	0.00151976
Trichoptera	Calamoceratidae	Calamoceras marsupus	0.18921	0.161854	0.177812	0.204407	0.18617	0.180851	0.191743	0.208967	0.00151976
Trichoptera	Ecnomidae	Ecnomus deceptor	0.235182	0.226064	0.232903	0.242021	0.235182	0.216945	0.237715	0.240502	0.225304	0.00151976
Trichoptera	Glossosomatidae	Agapetus delicatulus	0.234113	0.226655	0.235773	0.255549	0.24766	0.244653	0.229335	0.221007	0.211771	0.263709	0.00362124
Trichoptera	Glossosomatidae	Agapetus fuscipes	0.240509	0.233993	0.232952	0.252512	0.247953	0.223333	0.216614	0.235401	0.239151	0.262859	0.153318	0.049563
Trichoptera	Glossosomatidae	Agapetus incertulus	0.208207	0.202128	0.210486	0.226444	0.224924	0.204407	0.211246	0.215805	0.208967	0.235182	0.137588	0.100124	n/c
Trichoptera	Glossosomatidae	Agapetus nimbulus	0.217325	0.200608	0.222644	0.221884	0.231003	0.224164	0.22695	0.224924	0.212006	0.2481	0.131283	0.105992	0.0820669	n/c
Trichoptera	Glossosomatidae	Agapetus ochripes	0.223404	0.243161	0.213526	0.229483	0.221884	0.224164	0.234549	0.223404	0.216565	0.24886	0.16409	0.145437	0.135258	0.148936	n/c
Trichoptera	Glossosomatidae	Agapetus segovicus	0.22682	0.212868	0.226081	0.234095	0.239147	0.223179	0.222111	0.22117	0.215685	0.2518	0.135684	0.109667	0.100242	0.0749898	0.153245	0.0103571
Trichoptera	Glossosomatidae	Agapetus theischingeri	0.218845	0.214286	0.212006	0.25228	0.224924	0.218085	0.235562	0.231003	0.207447	0.25038	0.144389	0.119515	0.112462	0.120061	0.136778	0.128365	n/c
Trichoptera	Glossosomatidae	Catagapetus maclachlani	0.222391	0.20922	0.231003	0.253293	0.236069	0.227457	0.243077	0.235562	0.223658	0.27267	0.177099	0.186905	0.160334	0.169959	0.184904	0.180032	0.18465	0.0161094
Trichoptera	Glossosomatidae	Glossosoma privatum	0.240593	0.216272	0.220775	0.231216	0.24512	0.237661	0.238299	0.231381	0.218657	0.264064	0.224325	0.23219	0.204076	0.213486	0.220869	0.219118	0.226005	0.213605	0.000926882
Trichoptera	Glossosomatidae	Synagapetus diversus	0.241641	0.234043	0.245441	0.244681	0.24924	0.240122	0.238095	0.256839	0.222644	0.285334	0.165675	0.183023	0.162614	0.151976	0.18997	0.166324	0.162614	0.162361	0.223688	n/c							Stenophylax mucronatus
Trichoptera	Glossosomatidae	Synagapetus lusitanicus	0.238602	0.231003	0.240881	0.238602	0.246201	0.235562	0.232016	0.258359	0.225684	0.282295	0.168715	0.179168	0.155015	0.148936	0.183891	0.16415	0.162614	0.164894	0.222421	0.0319149	n/c
Trichoptera	Goeridae	Larcasia partita	0.148746	0.217135	0.212956	0.1856	0.169073	0.154825	0.163311	0.182561	0.183701	0.226444	0.240714	0.249928	0.224354	0.236132	0.230433	0.226239	0.230813	0.257789	0.265561	0.24905	0.241451	0.00276813
Trichoptera	Goeridae	Silo graellsii	0.135258	0.203647	0.208967	0.180851	0.167173	0.154255	0.155015	0.155015	0.18617	0.233663	0.231439	0.244097	0.214286	0.226444	0.227964	0.233448	0.220365	0.242148	0.242802	0.240122	0.237082	0.12804	n/c
Trichoptera	Helicopsychidae	Helicopsyche lusitanica	0.215805	0.18541	0.200608	0.208967	0.199088	0.199088	0.215046	0.199088	0.18693	0.246581	0.244578	0.242845	0.212766	0.211246	0.222644	0.223756	0.243921	0.243668	0.244252	0.25076	0.24848	0.205547	0.212766	0.0744681
Trichoptera	Helicopsychidae	Helicopsyche sp.	0.219605	0.202888	0.221884	0.221125	0.213526	0.212766	0.239362	0.207447	0.205167	0.271657	0.264851	0.279679	0.240881	0.236322	0.239362	0.24675	0.25152	0.252533	0.266908	0.265198	0.263678	0.231953	0.225684	0.103343	0.00151976
Trichoptera	Hydropsychidae	Cheumatopsyche lepida	0.255699	0.245061	0.262538	0.259878	0.25266	0.24848	0.265451	0.257599	0.232143	0.24962	0.250026	0.263513	0.235562	0.231003	0.237082	0.236556	0.25114	0.257725	0.232207	0.264058	0.265578	0.242591	0.244681	0.253419	0.278495	0.00151976
Trichoptera	Hydropsychidae	Diplectrona felix	0.244301	0.217705	0.235562	0.24848	0.232523	0.240122	0.254559	0.25228	0.231003	0.232713	0.255167	0.267943	0.236702	0.230623	0.24848	0.244484	0.259119	0.24734	0.24583	0.25266	0.24886	0.236512	0.230243	0.243921	0.25152	0.194529	0.00835866
Trichoptera	Hydropsychidae	Hydropsyche ambigua	0.256595	0.234502	0.249526	0.264851	0.26304	0.246853	0.267847	0.25486	0.225707	0.244158	0.266801	0.255975	0.232011	0.250366	0.253556	0.256924	0.243921	0.253209	0.264738	0.276685	0.268214	0.259003	0.239254	0.286611	0.293347	0.203724	0.193627	0.0463514
Trichoptera	Hydropsychidae	Hydropsyche brevis	0.253799	0.246201	0.24696	0.259878	0.234043	0.25304	0.261398	0.24848	0.236322	0.264058	0.265541	0.26028	0.244681	0.240122	0.261398	0.248864	0.253799	0.25076	0.264375	0.276596	0.278116	0.245251	0.237082	0.261398	0.275836	0.207827	0.193769	0.157063	0
Trichoptera	Hydropsychidae	Hydropsyche bulbifera	0.279273	0.256737	0.263661	0.282749	0.257392	0.267977	0.269226	0.263604	0.258746	0.262927	0.272002	0.265503	0.247506	0.253261	0.283404	0.240238	0.256793	0.270556	0.256885	0.284916	0.279759	0.275702	0.27705	0.288262	0.296923	0.229983	0.22212	0.188124	0.177561	0
Trichoptera	Hydropsychidae	Hydropsyche dinarica	0.241641	0.223404	0.238602	0.275076	0.24772	0.240881	0.241135	0.237842	0.240881	0.24734	0.259677	0.264418	0.234043	0.244681	0.264438	0.2474	0.25076	0.260892	0.242188	0.262918	0.258359	0.246391	0.241641	0.265198	0.275836	0.195289	0.193009	0.159704	0.141337	0.178813	n/c
Trichoptera	Hydropsychidae	Hydropsyche exocellata	0.225324	0.207235	0.216792	0.243967	0.222654	0.20731	0.227089	0.238692	0.196676	0.214085	0.242063	0.24298	0.210247	0.22306	0.25266	0.229432	0.23156	0.236076	0.235692	0.237454	0.237112	0.225786	0.228271	0.24211	0.25109	0.189532	0.176377	0.160534	0.157477	0.176557	0.152479	0
Trichoptera	Hydropsychidae	Hydropsyche iberomaroccana	0.240122	0.224924	0.24848	0.253799	0.240122	0.25	0.24772	0.25076	0.221125	0.25038	0.244686	0.266528	0.227964	0.221884	0.24772	0.232688	0.24924	0.246454	0.239725	0.268997	0.272036	0.266527	0.232523	0.266717	0.278875	0.199468	0.174012	0.157054	0.144377	0.177132	0.133739	0.147333	n/c
Trichoptera	Hydropsychidae	Hydropsyche infernalis	0.24772	0.226444	0.236322	0.262918	0.243161	0.237842	0.262411	0.243921	0.212006	0.245821	0.248523	0.259788	0.24924	0.241641	0.255319	0.259938	0.246201	0.25152	0.242436	0.261398	0.253799	0.258929	0.237082	0.276596	0.294073	0.209726	0.18465	0.106961	0.159574	0.175337	0.150456	0.14981	0.12614	n/c
Trichoptera	Hydropsychidae	Hydropsyche instabilis	0.244681	0.223911	0.238855	0.276089	0.238602	0.240122	0.256332	0.255826	0.222138	0.245314	0.257429	0.251058	0.23151	0.229483	0.246707	0.243327	0.257852	0.236829	0.25769	0.262918	0.253799	0.247784	0.232523	0.262665	0.27229	0.207953	0.185157	0.15258	0.157548	0.181206	0.161601	0.14702	0.160588	0.131712	0.014691
Trichoptera	Hydropsychidae	Hydropsyche lobata	0.283715	0.245616	0.253122	0.277229	0.251261	0.263391	0.270093	0.253926	0.247773	0.255552	0.273699	0.24757	0.254332	0.239939	0.264975	0.237019	0.251261	0.259009	0.256491	0.275396	0.269502	0.266233	0.258707	0.27692	0.288939	0.207597	0.20181	0.16877	0.157634	0.16469	0.183474	0.17411	0.162438	0.170347	0.177331	0.00162433
Trichoptera	Hydropsychidae	Hydropsyche pictetorum	0.240502	0.229863	0.242401	0.253419	0.25114	0.226824	0.260132	0.245061	0.223024	0.242781	0.247291	0.257233	0.231003	0.244301	0.2481	0.259518	0.244681	0.239995	0.242176	0.256079	0.2481	0.254084	0.234043	0.268617	0.278875	0.199088	0.193864	0.120423	0.149316	0.179953	0.141337	0.149175	0.135258	0.0847264	0.14881	0.174808	0.0615502
Trichoptera	Hydropsychidae	Hydropsyche siltalai	0.24829	0.227774	0.237937	0.262538	0.244681	0.238792	0.262158	0.244491	0.213716	0.245061	0.25065	0.258999	0.246391	0.242591	0.254559	0.259274	0.245821	0.251393	0.245206	0.263298	0.255509	0.257409	0.236702	0.277166	0.293123	0.207637	0.185648	0.0971513	0.158815	0.177068	0.151596	0.151129	0.130509	0.0165274	0.134815	0.170138	0.0897606	0.0329462
Trichoptera	Hydropsychidae	Hydropsyche tenuis	0.25076	0.235562	0.25228	0.258359	0.256839	0.243921	0.258865	0.24696	0.224164	0.239742	0.265541	0.251527	0.227964	0.24772	0.24772	0.252881	0.241641	0.249493	0.261659	0.275076	0.265957	0.245251	0.232523	0.279635	0.284954	0.193009	0.192629	0.0238483	0.153495	0.188586	0.159574	0.162004	0.161094	0.129179	0.152989	0.16703	0.125	0.113792	n/c
Trichoptera	Hydropsychidae	Hydropsyche tibialis	0.256332	0.253293	0.25228	0.248734	0.244174	0.246454	0.267477	0.229737	0.240375	0.263551	0.266191	0.273569	0.242655	0.244174	0.247214	0.24964	0.250253	0.24924	0.259801	0.266464	0.258865	0.259435	0.248227	0.275329	0.27381	0.190096	0.184144	0.160064	0.159068	0.182071	0.159068	0.162894	0.157042	0.14387	0.148936	0.180637	0.155648	0.14615	0.162107	0.00202634
Trichoptera	Hydroptilidae	Agraylea sexmaculata	0.255319	0.212766	0.225684	0.25228	0.240122	0.239362	0.248227	0.244681	0.242401	0.255699	0.245473	0.253103	0.241641	0.224924	0.24772	0.234201	0.241641	0.241895	0.242075	0.255319	0.25228	0.261208	0.264438	0.245441	0.259119	0.240881	0.238602	0.253837	0.240122	0.245057	0.24772	0.217102	0.25076	0.246201	0.254306	0.242974	0.245821	0.24791	0.255319	0.249747	0
Trichoptera	Hydroptilidae	Hydroptila fuentaldeala	0.226444	0.214286	0.213526	0.25228	0.234043	0.218085	0.235056	0.234802	0.215046	0.245061	0.230492	0.235991	0.211246	0.218845	0.235562	0.231703	0.220365	0.237589	0.235996	0.24772	0.240122	0.235752	0.232523	0.253799	0.269757	0.2481	0.227584	0.234825	0.226444	0.242778	0.238602	0.209093	0.223404	0.206687	0.225431	0.246605	0.217705	0.210866	0.237082	0.231003	0.227964	n/c
Trichoptera	Hydroptilidae	Ithytrichia clavata	0.218085	0.224924	0.24848	0.231003	0.237082	0.216565	0.22999	0.227964	0.194529	0.24886	0.22188	0.233642	0.196049	0.193009	0.208967	0.215858	0.207447	0.22923	0.217433	0.230243	0.233283	0.222834	0.224924	0.217325	0.25	0.229483	0.222264	0.249353	0.232523	0.264501	0.221884	0.205378	0.206687	0.221884	0.232523	0.242424	0.232143	0.225114	0.246201	0.218338	0.196049	0.191489	0.00151976
Trichoptera	Hydroptilidae	Oxyethira frici	0.287081	0.296651	0.284689	0.287081	0.277512	0.283493	0.30303	0.291866	0.261962	0.272129	0.254386	0.273325	0.239234	0.244019	0.227273	0.242823	0.26555	0.255981	0.285538	0.26555	0.26555	0.280203	0.301435	0.259569	0.29067	0.255383	0.241029	0.272727	0.279904	0.291866	0.287081	0.258373	0.282297	0.253589	0.260766	0.269993	0.264354	0.257476	0.277512	0.256778	0.23445	0.210526	0.22488	n/c
Trichoptera	Lepidostomatidae	Lepidostoma hirtum	0.176596	0.20304	0.213222	0.201216	0.180243	0.185562	0.185309	0.193617	0.194073	0.253419	0.240207	0.257212	0.246505	0.231307	0.261702	0.234265	0.238906	0.266211	0.254684	0.264742	0.264742	0.17443	0.18541	0.22386	0.233283	0.267249	0.242857	0.27201	0.254103	0.269855	0.268085	0.243075	0.249544	0.258967	0.257345	0.261543	0.267629	0.260258	0.267781	0.259473	0.242857	0.234954	0.235866	0.276077	0.00759878
Trichoptera	Leptoceridae	Adicella meridionalis	0.214286	0.193009	0.210486	0.217325	0.206687	0.224164	0.224417	0.224164	0.18617	0.25038	0.251637	0.246264	0.237082	0.237082	0.232523	0.238113	0.243161	0.241641	0.256119	0.265957	0.262918	0.217515	0.226444	0.212006	0.239362	0.25038	0.25	0.258514	0.243161	0.282637	0.243161	0.229915	0.238602	0.24772	0.260892	0.25703	0.244681	0.24886	0.253799	0.264944	0.232523	0.237082	0.234043	0.289474	0.236778	n/c
Trichoptera	Leptoceridae	Adicella reducta	0.226444	0.197568	0.209642	0.222729	0.204829	0.218254	0.222729	0.221462	0.187015	0.243288	0.253647	0.24674	0.220196	0.231847	0.236744	0.237025	0.23742	0.240684	0.24951	0.260554	0.255319	0.227858	0.230328	0.217072	0.241557	0.252744	0.240502	0.248488	0.248565	0.274209	0.245356	0.238844	0.234887	0.240122	0.262299	0.257939	0.242655	0.241156	0.248396	0.254981	0.232692	0.238771	0.239277	0.260766	0.224147	0.078183	0.0070922
Trichoptera	Leptoceridae	Athripsodes alentexanus	0.205167	0.197568	0.205927	0.224924	0.212766	0.197568	0.202128	0.229483	0.181611	0.254939	0.25902	0.259957	0.237082	0.232523	0.237082	0.240449	0.25076	0.235056	0.225606	0.246201	0.244681	0.216375	0.211246	0.213526	0.237842	0.254179	0.239742	0.257641	0.246201	0.274489	0.237082	0.206275	0.226444	0.253799	0.244174	0.247103	0.25038	0.254179	0.255319	0.251266	0.231003	0.221884	0.213526	0.272727	0.207599	0.18541	0.183722
Trichoptera	Leptoceridae	Athripsodes braueri	0.205167	0.197568	0.205927	0.224924	0.212766	0.197568	0.202128	0.229483	0.181611	0.254939	0.25902	0.259957	0.237082	0.232523	0.237082	0.240449	0.25076	0.235056	0.225606	0.246201	0.244681	0.216375	0.211246	0.213526	0.237842	0.254179	0.239742	0.257641	0.246201	0.274489	0.237082	0.206275	0.226444	0.253799	0.244174	0.247103	0.25038	0.254179	0.255319	0.251266	0.231003	0.221884	0.213526	0.272727	0.207599	0.18541	0.183722
Trichoptera	Leptoceridae	Athripsodes inaequalis	0.198075	0.205167	0.197822	0.22695	0.213273	0.203141	0.199088	0.218592	0.183637	0.234169	0.23698	0.245106	0.209726	0.22695	0.223911	0.225101	0.234549	0.243414	0.23129	0.252786	0.248227	0.194086	0.208713	0.212513	0.222644	0.250887	0.235689	0.244284	0.22695	0.257079	0.223404	0.210225	0.220871	0.248227	0.227457	0.255119	0.242528	0.247277	0.240628	0.232523	0.238095	0.216312	0.210233	0.26236	0.211753	0.190476	0.176292
Trichoptera	Leptoceridae	Athripsodes tavaresi	0.203141	0.224417	0.219098	0.240628	0.216819	0.213779	0.21074	0.234549	0.197315	0.255952	0.260731	0.259243	0.238095	0.246707	0.250253	0.249443	0.262411	0.254222	0.248625	0.255826	0.252786	0.200735	0.214792	0.228217	0.243414	0.266084	0.253926	0.269141	0.241135	0.255447	0.235056	0.233482	0.248734	0.261398	0.242655	0.269057	0.252786	0.262411	0.267984	0.256332	0.251266	0.230496	0.237335	0.269537	0.230902	0.203141	0.204998
Trichoptera	Leptoceridae	Ceraclea albimacula	0.234043	0.223911	0.208967	0.242655	0.220871	0.225177	0.224924	0.224164	0.201368	0.273176	0.247844	0.263409	0.240122	0.254813	0.243668	0.252051	0.25076	0.25439	0.246769	0.263931	0.266971	0.221948	0.210233	0.242908	0.250507	0.263931	0.266464	0.263917	0.27153	0.28747	0.277609	0.247697	0.265957	0.264944	0.262918	0.283764	0.260385	0.264754	0.261905	0.274063	0.278622	0.257345	0.260638	0.277512	0.243972	0.20922	0.204717
Trichoptera	Leptoceridae	Ceraclea sobradieli	0.217072	0.202381	0.203901	0.229483	0.222138	0.201368	0.212513	0.224924	0.178318	0.252153	0.231487	0.224042	0.203647	0.208713	0.215552	0.212362	0.223911	0.237842	0.228847	0.232016	0.227964	0.199405	0.190983	0.202381	0.229737	0.22847	0.241261	0.260875	0.248987	0.272455	0.245441	0.224017	0.247467	0.247974	0.245441	0.272783	0.238095	0.249493	0.260132	0.247974	0.236829	0.227964	0.221378	0.237241	0.218186	0.173506	0.169622
Trichoptera	Leptoceridae	Leptocerus tineiformis	0.207194	0.204154	0.214539	0.227457	0.212259	0.20542	0.211753	0.215299	0.18921	0.265324	0.248135	0.250608	0.235056	0.227457	0.243668	0.229189	0.224417	0.252195	0.244452	0.253293	0.244174	0.210043	0.204661	0.225431	0.241388	0.251266	0.252786	0.272497	0.278622	0.258381	0.261905	0.23924	0.267984	0.262411	0.268997	0.258322	0.252153	0.263678	0.271023	0.261398	0.246707	0.227457	0.23151	0.242424	0.228166	0.198075	0.207531
Trichoptera	Leptoceridae	Mystacides azureus	0.211246	0.202634	0.22695	0.218845	0.221378	0.206687	0.207194	0.221884	0.181611	0.242781	0.251753	0.239106	0.220365	0.237082	0.244681	0.218977	0.239615	0.254306	0.251003	0.259878	0.261398	0.211436	0.203647	0.240628	0.240375	0.264691	0.24848	0.23814	0.248734	0.256331	0.243668	0.220098	0.240122	0.25228	0.236575	0.274111	0.24924	0.25019	0.234043	0.254306	0.254813	0.235562	0.235562	0.283094	0.229787	0.201621	0.201283
Trichoptera	Leptoceridae	Oecetis testacea	0.231003	0.221884	0.237842	0.232523	0.227964	0.221125	0.233536	0.224924	0.228723	0.274696	0.270897	0.275436	0.25228	0.229483	0.25228	0.239907	0.258359	0.245947	0.25232	0.272036	0.273556	0.243731	0.234043	0.232523	0.24848	0.264438	0.25076	0.276643	0.265957	0.280955	0.259878	0.258019	0.232523	0.262918	0.272543	0.259354	0.256839	0.265198	0.279635	0.248227	0.258359	0.243161	0.237082	0.299043	0.256839	0.197568	0.193347
Trichoptera	Leptoceridae	Setodes argentipunctellus	0.200228	0.175152	0.198708	0.206307	0.199848	0.177812	0.193136	0.212006	0.162994	0.213526	0.219768	0.242774	0.208967	0.224924	0.232143	0.217666	0.236702	0.22771	0.226656	0.2519	0.24886	0.184081	0.180091	0.213906	0.227964	0.243921	0.203647	0.226969	0.223404	0.24666	0.218465	0.177326	0.210106	0.225684	0.222391	0.240851	0.217325	0.226254	0.230243	0.239362	0.237082	0.215046	0.217325	0.253589	0.227736	0.179711	0.178698
Trichoptera	Leptoceridae	Triaenodes ochreellus	0.231003	0.197568	0.207447	0.234043	0.202128	0.206687	0.220871	0.234802	0.183131	0.24886	0.245117	0.254525	0.224924	0.221884	0.244681	0.23024	0.229483	0.245947	0.247652	0.244681	0.241641	0.225494	0.218845	0.223404	0.25152	0.25114	0.229863	0.265606	0.255319	0.264174	0.25228	0.22731	0.24772	0.256839	0.235056	0.246609	0.270137	0.257409	0.264438	0.251266	0.24924	0.229483	0.221884	0.251196	0.238298	0.18845	0.18254
Trichoptera	Limnephilidae	Allogamus laureatus	0.177812	0.227964	0.225684	0.208207	0.200608	0.18921	0.181864	0.18693	0.213526	0.256459	0.253157	0.26947	0.246201	0.241641	0.255319	0.250714	0.256839	0.255319	0.273315	0.268997	0.270517	0.174962	0.167173	0.220365	0.239362	0.25266	0.237842	0.266596	0.262918	0.290186	0.258359	0.247662	0.253799	0.275076	0.24924	0.24605	0.263298	0.272416	0.253799	0.261905	0.272036	0.262918	0.240122	0.289474	0.18845	0.240122	0.249916
Trichoptera	Limnephilidae	Allogamus ligonifer	0.151722	0.236069	0.224797	0.222138	0.201874	0.191489	0.193262	0.184904	0.224164	0.260512	0.257863	0.264335	0.250507	0.234549	0.247974	0.231388	0.24696	0.245356	0.266587	0.260132	0.261651	0.159638	0.170213	0.225304	0.243161	0.252533	0.24772	0.275278	0.257345	0.273919	0.257092	0.263822	0.27153	0.276849	0.268068	0.260636	0.26906	0.275583	0.265198	0.271023	0.260132	0.258865	0.246201	0.265949	0.181054	0.243921	0.251069
Trichoptera	Limnephilidae	Allogamus mortoni	0.152989	0.220871	0.219605	0.208713	0.184904	0.179078	0.168693	0.178825	0.212513	0.25038	0.243263	0.253798	0.234043	0.236069	0.236575	0.230439	0.24772	0.234211	0.256593	0.258359	0.254813	0.1433	0.16616	0.219605	0.236322	0.254306	0.233029	0.263999	0.248227	0.268733	0.246707	0.243135	0.254306	0.257852	0.250253	0.25272	0.255193	0.257662	0.254813	0.256839	0.240628	0.257852	0.223404	0.279904	0.178217	0.224924	0.236913
Trichoptera	Limnephilidae	Annitella esparraguera	0.156535	0.218845	0.226444	0.208207	0.179331	0.190729	0.190476	0.203647	0.218085	0.259498	0.261047	0.266472	0.25076	0.241641	0.241641	0.241912	0.244681	0.25076	0.288372	0.265957	0.259878	0.166223	0.168693	0.221125	0.237842	0.25228	0.216185	0.263008	0.255319	0.278675	0.258359	0.247256	0.246201	0.267477	0.243668	0.256194	0.267477	0.265767	0.253799	0.25228	0.25228	0.25228	0.235562	0.27512	0.185714	0.226444	0.236069
Trichoptera	Limnephilidae	Chaetopteryx atlantica	0.155015	0.237082	0.227204	0.200608	0.193009	0.198328	0.178318	0.180851	0.224164	0.273936	0.255183	0.256804	0.25228	0.235562	0.243161	0.233497	0.229483	0.258359	0.268789	0.267477	0.265957	0.166983	0.164134	0.237842	0.25152	0.267857	0.2481	0.280748	0.253799	0.282693	0.262918	0.269659	0.255319	0.272036	0.265451	0.261811	0.278875	0.272226	0.272036	0.275076	0.244681	0.253799	0.239362	0.299043	0.190881	0.241641	0.244343
Trichoptera	Limnephilidae	Drusus berthelemyi	0.156535	0.202128	0.221125	0.203647	0.191489	0.172492	0.174265	0.180851	0.204407	0.232903	0.2331	0.246321	0.220365	0.226444	0.235562	0.237789	0.237082	0.252026	0.25739	0.264438	0.259878	0.137348	0.153495	0.213526	0.236322	0.2481	0.242401	0.269087	0.264438	0.276283	0.237082	0.239098	0.258359	0.25076	0.232523	0.260508	0.24696	0.25209	0.262918	0.260892	0.267477	0.237082	0.218845	0.287081	0.186018	0.226444	0.240797
Trichoptera	Limnephilidae	Drusus bolivari	0.158055	0.200608	0.212006	0.197568	0.182371	0.169453	0.184904	0.18693	0.197568	0.254179	0.234113	0.243225	0.215805	0.215805	0.231003	0.232737	0.232523	0.245187	0.252793	0.261398	0.256839	0.148366	0.164134	0.210486	0.234802	0.255699	0.25076	0.267276	0.259878	0.268846	0.25076	0.250951	0.253799	0.24772	0.23151	0.250549	0.24962	0.24962	0.261398	0.27001	0.256839	0.241641	0.223404	0.289474	0.183891	0.227964	0.242655
Trichoptera	Limnephilidae	Enoicyla pusilla	0.161094	0.231003	0.234802	0.211246	0.191489	0.195289	0.197568	0.203647	0.218085	0.265578	0.262501	0.265656	0.25076	0.235562	0.243161	0.245768	0.241641	0.25228	0.264375	0.275076	0.270517	0.163564	0.161094	0.228723	0.239362	0.25266	0.236702	0.262576	0.259878	0.298221	0.267477	0.277475	0.261398	0.264438	0.256839	0.26764	0.261018	0.263108	0.25228	0.263931	0.272036	0.246201	0.240122	0.267943	0.196353	0.241641	0.24333
Trichoptera	Limnephilidae	Grammotaulius submaculatus	0.143617	0.196809	0.208967	0.193009	0.18541	0.18541	0.192503	0.18921	0.182371	0.233663	0.226655	0.252977	0.225684	0.236322	0.233283	0.230021	0.215046	0.239362	0.248921	0.243921	0.242401	0.154445	0.150456	0.226824	0.246201	0.254179	0.237082	0.255798	0.256079	0.275143	0.271277	0.245366	0.245441	0.25076	0.251773	0.259141	0.245821	0.25076	0.25076	0.258865	0.24924	0.255319	0.236322	0.272727	0.168085	0.226444	0.214455
Trichoptera	Limnephilidae	Halesus radiatus	0.140198	0.227584	0.230623	0.206307	0.200608	0.18807	0.186297	0.182751	0.216185	0.263298	0.258934	0.246057	0.238222	0.224544	0.235942	0.242512	0.254939	0.262791	0.26204	0.280775	0.279255	0.177717	0.168693	0.217325	0.227584	0.267477	0.242021	0.277504	0.261018	0.280633	0.25114	0.258282	0.244301	0.257979	0.260512	0.262956	0.259498	0.259878	0.271657	0.27115	0.244301	0.238982	0.217705	0.291268	0.162842	0.234422	0.231636
Trichoptera	Limnephilidae	Limnephilus bipunctatus	0.167464	0.212919	0.222488	0.186603	0.188995	0.185407	0.186603	0.177033	0.204545	0.264952	0.26236	0.270933	0.267943	0.253589	0.241627	0.246411	0.263158	0.247608	0.299114	0.270335	0.263158	0.170156	0.150718	0.216507	0.228469	0.255383	0.24701	0.257177	0.267943	0.284689	0.27512	0.260766	0.277512	0.267943	0.274322	0.255981	0.250598	0.266746	0.255981	0.266348	0.251196	0.248804	0.276316	0.272727	0.202871	0.251196	0.234716
Trichoptera	Limnephilidae	Limnephilus guadarramicus	0.16768	0.222898	0.208207	0.179331	0.187437	0.187183	0.191996	0.191236	0.197822	0.260512	0.244489	0.252418	0.240122	0.238602	0.218338	0.2361	0.241135	0.236998	0.259657	0.251773	0.254813	0.157738	0.148936	0.220618	0.243414	0.238475	0.250253	0.248426	0.246707	0.296141	0.271023	0.266897	0.246201	0.248734	0.242992	0.245882	0.255952	0.248164	0.244174	0.25228	0.259372	0.261905	0.236069	0.285486	0.191388	0.219858	0.241191
Trichoptera	Limnephilidae	Limnephilus hirsutus	0.16464	0.23151	0.229737	0.205167	0.204154	0.172492	0.178825	0.201114	0.220111	0.250887	0.252747	0.259736	0.240628	0.239108	0.230496	0.237011	0.251266	0.244765	0.271472	0.254306	0.250253	0.148746	0.162614	0.217072	0.233789	0.251773	0.24962	0.273085	0.270517	0.271107	0.27153	0.243071	0.259372	0.265451	0.264944	0.264063	0.257852	0.265641	0.265451	0.281155	0.254813	0.261398	0.245187	0.301435	0.191692	0.239108	0.239784
Trichoptera	Limnephilidae	Limnephilus sparsus	0.141641	0.215502	0.209574	0.185106	0.178116	0.160942	0.151672	0.169909	0.195289	0.239742	0.243641	0.249326	0.207903	0.231915	0.240122	0.225765	0.239514	0.235714	0.258164	0.259878	0.258967	0.136284	0.148632	0.213678	0.227204	0.242857	0.235486	0.254623	0.252584	0.2801	0.25076	0.244211	0.232523	0.263526	0.23921	0.260282	0.248784	0.261436	0.245289	0.250963	0.258359	0.238906	0.237082	0.269378	0.175988	0.239818	0.224755
Trichoptera	Limnephilidae	Limnephilus vittatus	0.162107	0.232016	0.231256	0.184397	0.189463	0.156788	0.174265	0.178825	0.200861	0.246074	0.252338	0.256255	0.237082	0.234043	0.248734	0.237515	0.25076	0.252786	0.264035	0.262918	0.255319	0.154192	0.147923	0.203141	0.218592	0.241135	0.233916	0.263345	0.257345	0.288411	0.27153	0.253008	0.256332	0.251773	0.242655	0.254403	0.254053	0.25247	0.255826	0.259372	0.260892	0.228977	0.222898	0.276715	0.184296	0.245694	0.239108
Trichoptera	Limnephilidae	Mesophylax aspersus	0.162614	0.224924	0.236322	0.205167	0.204407	0.181611	0.184144	0.18921	0.221884	0.257979	0.244934	0.247833	0.245441	0.242401	0.25152	0.240283	0.242401	0.248987	0.27172	0.266717	0.263678	0.154445	0.175532	0.231763	0.24772	0.261018	0.256079	0.293148	0.272796	0.284589	0.268237	0.265141	0.272796	0.279635	0.272796	0.266199	0.289134	0.28049	0.284954	0.283181	0.257599	0.256079	0.241641	0.295455	0.172036	0.237842	0.240713
Trichoptera	Limnephilidae	Micropterna sequax	0.160714	0.216185	0.219225	0.184271	0.183131	0.18655	0.189083	0.194529	0.201748	0.246201	0.24045	0.25812	0.245441	0.231763	0.243921	0.237082	0.254559	0.263298	0.270346	0.270897	0.263298	0.142097	0.161094	0.234992	0.244681	0.269377	0.25076	0.276176	0.269377	0.28117	0.270137	0.252665	0.262538	0.257599	0.252533	0.262882	0.258454	0.259166	0.268617	0.284701	0.259498	0.25	0.242401	0.291268	0.184422	0.235562	0.244048
Trichoptera	Limnephilidae	Potamophylax cingulatus	0.171081	0.225792	0.242618	0.215154	0.195832	0.196157	0.204226	0.189752	0.231546	0.26167	0.273554	0.28558	0.263135	0.252714	0.247069	0.261119	0.253799	0.270119	0.275007	0.270734	0.272688	0.173171	0.186713	0.223838	0.250217	0.255916	0.240284	0.270657	0.272905	0.281993	0.256839	0.267386	0.265523	0.249023	0.258214	0.27766	0.26129	0.25133	0.265957	0.254957	0.257056	0.270517	0.230352	0.314081	0.197264	0.24251	0.246997
Trichoptera	Limnephilidae	Potamophylax latipennis	0.183891	0.244681	0.25228	0.224164	0.201748	0.216945	0.214159	0.203267	0.25	0.288374	0.272642	0.294786	0.267477	0.267477	0.25152	0.277487	0.268997	0.266717	0.285605	0.284195	0.284195	0.179521	0.18845	0.245061	0.255699	0.267857	0.254939	0.300406	0.280015	0.297787	0.270897	0.277779	0.274316	0.275076	0.264944	0.274088	0.269947	0.277451	0.292553	0.270643	0.259498	0.270517	0.25038	0.301435	0.203799	0.242401	0.251351
Trichoptera	Limnephilidae	Stenophylax fissus	0.156535	0.206687	0.210486	0.200608	0.180851	0.18921	0.185917	0.193009	0.195289	0.24734	0.237734	0.262462	0.231003	0.235562	0.217325	0.228663	0.235562	0.25304	0.259778	0.267477	0.262918	0.148746	0.158055	0.219605	0.239362	0.243541	0.221125	0.269485	0.24924	0.293064	0.255319	0.253279	0.237082	0.24772	0.231003	0.258244	0.260258	0.24962	0.262918	0.24924	0.261398	0.237082	0.238602	0.282297	0.171429	0.209726	0.218338
Trichoptera	Limnephilidae	Stenophylax mucronatus	0.154407	0.214286	0.219301	0.193009	0.176596	0.181915	0.183485	0.185106	0.211702	0.255699	0.242935	0.250162	0.232827	0.231307	0.233435	0.241828	0.240729	0.240679	0.260613	0.255015	0.255015	0.153002	0.157143	0.221581	0.247872	0.244453	0.225	0.264821	0.258967	0.281822	0.257751	0.248747	0.23921	0.243769	0.240831	0.258849	0.254559	0.245897	0.259271	0.266464	0.254711	0.234347	0.237386	0.282775	0.170334	0.231307	0.238703
Trichoptera	Limnephilidae	Stenophylax permistus	0.155015	0.227964	0.224164	0.212766	0.18541	0.190729	0.181358	0.18845	0.219605	0.254939	0.262717	0.278645	0.253799	0.241641	0.243161	0.253479	0.261398	0.253546	0.260861	0.264438	0.264438	0.155205	0.164134	0.223404	0.237842	0.254179	0.226824	0.266263	0.262918	0.284916	0.256839	0.256097	0.24924	0.255319	0.239108	0.258799	0.259878	0.256079	0.259878	0.256839	0.253799	0.25228	0.240122	0.291866	0.17234	0.227964	0.235056
Trichoptera	Limnephilidae	Stenophylax vibex	0.141337	0.221884	0.225684	0.200608	0.182371	0.192249	0.184904	0.177812	0.205927	0.25038	0.250258	0.266739	0.238602	0.235562	0.240122	0.241969	0.261398	0.24696	0.265857	0.258359	0.256839	0.150836	0.142857	0.221884	0.242401	0.260258	0.242401	0.267459	0.264438	0.287907	0.262918	0.256162	0.234043	0.255319	0.253799	0.253154	0.259878	0.256079	0.259878	0.268997	0.267477	0.24924	0.235562	0.282297	0.178419	0.223404	0.23151
Trichoptera	Odontoceridae	Odontocerum albicorne	0.192503	0.190476	0.192503	0.193769	0.189463	0.191996	0.210486	0.209726	0.180344	0.232903	0.237121	0.244475	0.217832	0.20846	0.223404	0.212903	0.223658	0.231932	0.236358	0.248227	0.242148	0.189146	0.18617	0.203014	0.210993	0.236322	0.223848	0.233947	0.241895	0.27311	0.237335	0.215468	0.220618	0.239615	0.233452	0.253795	0.22695	0.237557	0.224164	0.240628	0.235309	0.201621	0.223151	0.254785	0.220669	0.209473	0.222335
Trichoptera	Odontoceridae	Odontocerum lusitanicum	0.206003	0.197968	0.194211	0.20644	0.20264	0.202746	0.224982	0.223172	0.18873	0.242679	0.242692	0.255337	0.221975	0.222848	0.23882	0.220911	0.227844	0.24139	0.246458	0.252174	0.249135	0.212531	0.20492	0.21812	0.219914	0.256449	0.22999	0.238813	0.244463	0.284644	0.252723	0.226331	0.231643	0.246419	0.243999	0.269894	0.23425	0.244776	0.235231	0.249716	0.247939	0.213715	0.243492	0.248804	0.228083	0.223608	0.225764
Trichoptera	Philopotamidae	Chimarra marginata	0.256459	0.217579	0.232396	0.264564	0.225431	0.23189	0.249367	0.239235	0.217199	0.246327	0.241923	0.247548	0.233916	0.234422	0.239108	0.239536	0.240248	0.24181	0.251138	0.244048	0.246581	0.255003	0.253926	0.231763	0.241135	0.238349	0.23075	0.253664	0.24962	0.28502	0.239362	0.218412	0.241388	0.248607	0.237335	0.262999	0.249272	0.248211	0.24696	0.253293	0.241388	0.234802	0.238728	0.268939	0.260892	0.255572	0.266422
Trichoptera	Philopotamidae	Philopotamus amphilectus	0.220365	0.177812	0.196049	0.234043	0.215805	0.208207	0.20922	0.230243	0.18921	0.212386	0.225782	0.22638	0.197568	0.191489	0.226444	0.211833	0.215805	0.224164	0.218477	0.255319	0.25228	0.221695	0.229483	0.224924	0.245441	0.243541	0.234802	0.251013	0.238602	0.263632	0.240122	0.213407	0.229483	0.241641	0.217325	0.24459	0.237082	0.243161	0.25076	0.242655	0.237082	0.203647	0.212766	0.253589	0.234043	0.231003	0.231341
Trichoptera	Philopotamidae	Philopotamus montanus caurelensis	0.244681	0.205384	0.201151	0.246635	0.224707	0.238059	0.241931	0.246309	0.204407	0.231926	0.240619	0.255104	0.232957	0.217977	0.244464	0.227187	0.220365	0.259878	0.236217	0.252714	0.250109	0.242971	0.24403	0.227312	0.242401	0.247286	0.232848	0.251122	0.239687	0.257703	0.231003	0.202497	0.233174	0.244681	0.254668	0.249326	0.245386	0.245142	0.250109	0.252135	0.233174	0.23122	0.219279	0.273411	0.238602	0.230786	0.234404
Trichoptera	Philopotamidae	Philopotamus perversus	0.239108	0.198582	0.21074	0.229737	0.217579	0.227204	0.238349	0.220618	0.193262	0.218212	0.222423	0.247055	0.222391	0.225431	0.245694	0.217778	0.231763	0.242823	0.229774	0.249747	0.252533	0.240628	0.235816	0.220491	0.229483	0.238349	0.227077	0.249623	0.247214	0.251121	0.231256	0.20583	0.224924	0.244174	0.254813	0.244672	0.241958	0.244871	0.251266	0.250253	0.233029	0.223151	0.210486	0.277512	0.239311	0.218338	0.215299
Trichoptera	Philopotamidae	Philopotamus variegatus	0.232523	0.200608	0.208967	0.241641	0.222644	0.217325	0.235309	0.240881	0.198328	0.228343	0.236754	0.246919	0.210486	0.210486	0.237842	0.222475	0.219605	0.242908	0.228433	0.256839	0.246201	0.243731	0.221125	0.223404	0.25	0.231763	0.221125	0.253007	0.239362	0.269771	0.237082	0.221458	0.218085	0.24848	0.233283	0.244267	0.236322	0.24848	0.25	0.238095	0.25152	0.224164	0.201368	0.254785	0.252128	0.253799	0.240881
Trichoptera	Philopotamidae	Wormaldia beaumonti	0.237842	0.214286	0.202888	0.221884	0.200608	0.217325	0.216312	0.211246	0.194529	0.220365	0.222161	0.225212	0.206687	0.210486	0.217325	0.20746	0.218845	0.240628	0.232431	0.234043	0.231763	0.218845	0.237082	0.227204	0.24772	0.232143	0.2481	0.254855	0.240122	0.267594	0.231763	0.222003	0.242401	0.243161	0.249747	0.253339	0.240312	0.244111	0.25228	0.245694	0.25228	0.231763	0.214286	0.241627	0.230091	0.224164	0.217072
Trichoptera	Philopotamidae	Wormaldia corvina	0.227964	0.211246	0.210486	0.237082	0.209726	0.204407	0.237082	0.234043	0.201368	0.210866	0.240633	0.233712	0.226444	0.220365	0.227964	0.220143	0.217325	0.235056	0.2276	0.231003	0.238602	0.240502	0.226444	0.236322	0.259119	0.240502	0.225684	0.246196	0.24772	0.253803	0.238602	0.207577	0.229483	0.238602	0.229483	0.24605	0.234043	0.239742	0.24772	0.246707	0.246201	0.235562	0.235562	0.267943	0.250456	0.226444	0.219352
Trichoptera	Philopotamidae	Wormaldia lusitanica	0.238602	0.212766	0.199088	0.220365	0.200608	0.216565	0.213273	0.210486	0.198328	0.226064	0.228897	0.229969	0.205167	0.209726	0.215805	0.203144	0.223404	0.242908	0.236395	0.234043	0.234043	0.215995	0.237082	0.225684	0.245441	0.232143	0.240881	0.250258	0.234043	0.261838	0.226444	0.216418	0.235562	0.240122	0.246201	0.251385	0.237082	0.240502	0.246201	0.244174	0.24924	0.227964	0.211246	0.248804	0.227052	0.221884	0.212091
Trichoptera	Philopotamidae	Wormaldia occipitalis	0.235562	0.221884	0.221125	0.224924	0.193009	0.208967	0.216312	0.217325	0.208967	0.232143	0.237443	0.235021	0.209726	0.212766	0.220365	0.204445	0.215805	0.232523	0.233534	0.25228	0.25228	0.223974	0.240122	0.212513	0.236322	0.24924	0.243161	0.269992	0.232523	0.257279	0.231003	0.22306	0.229483	0.256839	0.242655	0.250702	0.24696	0.257789	0.262918	0.246707	0.24772	0.237589	0.210233	0.241627	0.225228	0.223404	0.220365
Trichoptera	Philopotamidae	Wormaldia triangulifera	0.214286	0.211246	0.193769	0.217325	0.193009	0.199848	0.199595	0.206687	0.178571	0.227584	0.229619	0.232628	0.206687	0.197568	0.211246	0.197008	0.214286	0.226697	0.221085	0.234043	0.224924	0.199278	0.215805	0.213526	0.245441	0.214666	0.211246	0.249859	0.227964	0.242348	0.227964	0.218405	0.229483	0.237082	0.23151	0.251261	0.234422	0.238412	0.246201	0.234043	0.231003	0.221884	0.211246	0.239234	0.219453	0.217325	0.212259
Trichoptera	Philopotamidae	Wormaldia variegata mattheyi	0.236702	0.227204	0.228343	0.24734	0.225304	0.221505	0.22619	0.239362	0.209347	0.2481	0.259365	0.249817	0.224544	0.226444	0.246581	0.2299	0.240122	0.244807	0.254111	0.238602	0.24772	0.229673	0.246581	0.244301	0.265198	0.259214	0.25057	0.266487	0.261398	0.27832	0.24734	0.228255	0.245441	0.256459	0.261272	0.273899	0.248575	0.257409	0.263298	0.262031	0.262158	0.239742	0.235182	0.27512	0.257675	0.234422	0.245399
Trichoptera	Phryganeidae	Agrypnia varia	0.169453	0.210486	0.208207	0.196049	0.179331	0.176292	0.180598	0.18921	0.195289	0.260258	0.255582	0.253603	0.240881	0.236322	0.24696	0.234099	0.233283	0.262665	0.269152	0.262918	0.264438	0.180471	0.165653	0.216565	0.228723	0.256459	0.246581	0.272509	0.24696	0.269986	0.25152	0.256162	0.241641	0.259119	0.272036	0.255963	0.266717	0.260163	0.267477	0.274063	0.226444	0.268997	0.240122	0.312201	0.160942	0.213526	0.228977
Trichoptera	Polycentropodidae	Cyrnus cintranus	0.251196	0.244019	0.236842	0.284689	0.255981	0.25	0.255183	0.253589	0.240431	0.147727	0.27193	0.284091	0.239234	0.279904	0.251196	0.27512	0.246411	0.264753	0.263973	0.282297	0.279904	0.257476	0.255981	0.285885	0.309809	0.264952	0.25299	0.238437	0.258373	0.270335	0.246411	0.203349	0.248804	0.244019	0.253589	0.284347	0.239234	0.243421	0.241627	0.240032	0.246411	0.258373	0.266746	0.277512	0.271292	0.263158	0.263158
Trichoptera	Polycentropodidae	Plectrocnemia geniculata	0.27512	0.23445	0.255981	0.277512	0.270335	0.260766	0.258373	0.272727	0.266746	0.15012	0.286284	0.301435	0.260766	0.284689	0.27512	0.29067	0.277512	0.286683	0.257187	0.294258	0.294258	0.259868	0.251196	0.287081	0.300239	0.257775	0.236244	0.251595	0.255981	0.272727	0.239234	0.232057	0.255981	0.258373	0.23445	0.269993	0.251196	0.257775	0.251196	0.254386	0.260766	0.248804	0.276316	0.287081	0.285167	0.27512	0.274854
Trichoptera	Polycentropodidae	Plectrocnemia laetabilis	0.246809	0.214894	0.227812	0.259878	0.240122	0.236322	0.240729	0.245441	0.233891	0.16497	0.267434	0.267555	0.246505	0.240426	0.258663	0.253926	0.244985	0.268997	0.253811	0.281459	0.2769	0.251178	0.224012	0.263982	0.276444	0.241869	0.23465	0.234452	0.240729	0.259382	0.249848	0.22414	0.23921	0.231611	0.236677	0.241919	0.23579	0.232181	0.23617	0.241743	0.246809	0.251368	0.256383	0.284689	0.268997	0.263526	0.256602
Trichoptera	Polycentropodidae	Polycentropus corniger	0.25152	0.2481	0.235182	0.266337	0.241261	0.24924	0.265324	0.258739	0.238602	0.191869	0.286245	0.28161	0.255319	0.275076	0.261398	0.262816	0.265198	0.272163	0.277403	0.292173	0.283055	0.257029	0.2519	0.273936	0.289894	0.24962	0.255889	0.244298	0.24734	0.264281	0.263298	0.237165	0.257979	0.240122	0.254053	0.25879	0.24867	0.240264	0.244301	0.235056	0.276216	0.276596	0.267097	0.258373	0.286702	0.268997	0.263045
Trichoptera	Polycentropodidae	Polycentropus flavomaculatus	0.24924	0.238602	0.230243	0.273556	0.240881	0.24848	0.251266	0.25152	0.219605	0.172112	0.281578	0.283802	0.24848	0.270517	0.259878	0.2733	0.260638	0.288501	0.278812	0.280395	0.281915	0.237462	0.240881	0.271277	0.294833	0.257979	0.258359	0.243231	0.253799	0.277124	0.254559	0.224299	0.256079	0.236322	0.236322	0.272772	0.235182	0.237082	0.242401	0.247974	0.262158	0.275076	0.263678	0.266746	0.293161	0.259878	0.257177
Trichoptera	Polycentropodidae	Polycentropus intricatus	0.263425	0.239108	0.227204	0.268997	0.246707	0.256586	0.260385	0.265704	0.239868	0.198202	0.296699	0.277279	0.260385	0.269504	0.261398	0.264716	0.267984	0.278453	0.278052	0.299392	0.293313	0.248037	0.25228	0.281155	0.308764	0.25228	0.260005	0.256728	0.261905	0.27746	0.266971	0.244515	0.261398	0.255319	0.248227	0.265579	0.255319	0.255319	0.25228	0.253799	0.260385	0.282675	0.280902	0.26874	0.275988	0.256839	0.25228
Trichoptera	Polycentropodidae	Polycentropus kingi	0.247886	0.238113	0.21837	0.261078	0.236917	0.235337	0.2433	0.256491	0.220519	0.167135	0.276137	0.270099	0.239196	0.262443	0.251362	0.262743	0.2531	0.273548	0.266442	0.281335	0.280195	0.230196	0.243327	0.273926	0.294482	0.258153	0.259318	0.256687	0.255977	0.276525	0.259348	0.218518	0.251636	0.245824	0.24081	0.266486	0.248253	0.247223	0.256414	0.240754	0.265096	0.261078	0.26092	0.258373	0.282075	0.263583	0.257724
Trichoptera	Polycentropodidae	Polycentropus telifer	0.258359	0.240122	0.225684	0.278116	0.255319	0.25304	0.26849	0.257599	0.231763	0.18503	0.287699	0.280221	0.253799	0.272036	0.253799	0.27178	0.258359	0.285714	0.27255	0.287234	0.281155	0.242971	0.25076	0.274316	0.298632	0.253799	0.262918	0.259635	0.272036	0.281497	0.241641	0.230535	0.259878	0.244681	0.24772	0.267636	0.25076	0.245821	0.256839	0.243161	0.261398	0.281155	0.262158	0.263158	0.287842	0.268997	0.251773
Trichoptera	Psychomyiidae	Lype auripilis	0.268997	0.258359	0.266717	0.288754	0.264438	0.286474	0.275076	0.262158	0.24848	0.235182	0.274368	0.286356	0.253799	0.25228	0.262918	0.265427	0.264438	0.27077	0.27878	0.293313	0.299392	0.271847	0.259878	0.275076	0.274316	0.25038	0.242021	0.271329	0.265957	0.272322	0.25076	0.257187	0.25228	0.256839	0.251773	0.262365	0.24696	0.258549	0.270517	0.239108	0.270517	0.288754	0.24772	0.315789	0.270213	0.267477	0.26106
Trichoptera	Psychomyiidae	Lype phaeopa	0.278116	0.244681	0.25152	0.272036	0.262918	0.263678	0.263425	0.274316	0.25304	0.220745	0.277417	0.278152	0.25228	0.241641	0.259878	0.250334	0.268997	0.281408	0.266439	0.272036	0.281155	0.278685	0.25228	0.279635	0.297112	0.254179	0.24734	0.274002	0.253799	0.270584	0.267477	0.25849	0.243161	0.24924	0.25076	0.256129	0.267857	0.25247	0.275076	0.259372	0.273556	0.258359	0.257599	0.303828	0.264742	0.267477	0.254813
Trichoptera	Psychomyiidae	Metalype fragilis	0.253799	0.240122	0.262158	0.246201	0.232523	0.25	0.247214	0.256079	0.218085	0.216945	0.256197	0.285216	0.258359	0.24924	0.275076	0.254894	0.25076	0.274569	0.282509	0.262918	0.262918	0.245251	0.241641	0.272796	0.277356	0.240502	0.240122	0.252974	0.232523	0.260044	0.265957	0.231282	0.235562	0.240122	0.237589	0.228151	0.236702	0.241071	0.24924	0.240628	0.264438	0.255319	0.240881	0.279904	0.24772	0.261398	0.261398
Trichoptera	Psychomyiidae	Paduniella vandeli	0.25228	0.24772	0.25	0.259878	0.25228	0.243921	0.256332	0.264438	0.228723	0.218465	0.265831	0.286849	0.25076	0.261398	0.258359	0.264723	0.265957	0.267477	0.268643	0.278116	0.281155	0.261968	0.255319	0.273556	0.281915	0.267857	0.254939	0.272848	0.253799	0.284205	0.258359	0.226285	0.262918	0.268997	0.262918	0.266523	0.2519	0.269377	0.270517	0.264944	0.279635	0.262918	0.258359	0.296651	0.256535	0.256839	0.260047
Trichoptera	Psychomyiidae	Psychomyia pusilla	0.244247	0.227529	0.231546	0.242076	0.230786	0.235671	0.253003	0.255319	0.214611	0.199251	0.277017	0.282458	0.239036	0.243161	0.255536	0.261808	0.250109	0.268092	0.26805	0.271168	0.267477	0.237326	0.242944	0.251737	0.276053	0.230297	0.227801	0.249793	0.242076	0.268678	0.238385	0.225553	0.219496	0.243161	0.238602	0.244997	0.235291	0.242645	0.241424	0.22572	0.258359	0.247069	0.229809	0.295967	0.259922	0.243161	0.235562
Trichoptera	Psychomyiidae	Tinodes assimilis	0.248328	0.234043	0.245137	0.248936	0.246505	0.243617	0.241743	0.222948	0.222948	0.198708	0.24865	0.255558	0.225228	0.224316	0.243465	0.2324	0.246809	0.26079	0.258741	0.258663	0.262614	0.240691	0.220061	0.253951	0.267629	0.260486	0.226672	0.23771	0.2231	0.253575	0.236474	0.23168	0.239818	0.242249	0.240122	0.237884	0.226596	0.240046	0.22614	0.232016	0.26535	0.242249	0.243009	0.299043	0.259514	0.258663	0.244951
Trichoptera	Psychomyiidae	Tinodes foedellus	0.234043	0.218085	0.224164	0.257599	0.244681	0.235562	0.234296	0.253799	0.214286	0.183511	0.270789	0.277941	0.237082	0.233283	0.259878	0.242922	0.241641	0.267984	0.254855	0.265198	0.263678	0.217135	0.231763	0.24772	0.259878	0.242021	0.223404	0.249536	0.25152	0.263661	0.237082	0.213087	0.227964	0.240881	0.244174	0.238636	0.237652	0.240881	0.242401	0.251773	0.259119	0.255319	0.233283	0.295455	0.242857	0.25304	0.246032
Trichoptera	Psychomyiidae	Tinodes maculicornis	0.256839	0.253799	0.24696	0.25228	0.235562	0.231763	0.247214	0.25228	0.231763	0.202508	0.277493	0.268695	0.24772	0.241641	0.246201	0.254676	0.25228	0.272036	0.266148	0.25228	0.25228	0.227774	0.238602	0.25304	0.271277	0.244681	0.224924	0.260357	0.24772	0.272322	0.278116	0.236216	0.25228	0.243161	0.259878	0.254457	0.245061	0.245441	0.256839	0.243668	0.24924	0.24772	0.243921	0.27512	0.264438	0.264438	0.253293
Trichoptera	Psychomyiidae	Tinodes waeneri	0.242593	0.236514	0.243444	0.239202	0.233963	0.219791	0.236532	0.239226	0.199162	0.184829	0.265156	0.267361	0.238062	0.234913	0.256929	0.238822	0.228912	0.259843	0.275469	0.261076	0.256978	0.237022	0.241073	0.252231	0.265965	0.268174	0.241245	0.248003	0.254674	0.268088	0.25454	0.223201	0.244985	0.234477	0.24255	0.244809	0.236561	0.235641	0.24216	0.249145	0.268489	0.244246	0.257286	0.29695	0.259519	0.249759	0.24693
Trichoptera	Ptilocolepidae	Ptilocolepus extensus	0.240924	0.208849	0.226364	0.245408	0.227452	0.224844	0.235658	0.245624	0.195917	0.213959	0.213511	0.21792	0.185527	0.195959	0.21247	0.200539	0.192769	0.222979	0.236528	0.233315	0.225426	0.224676	0.218765	0.229047	0.253556	0.240574	0.232426	0.242947	0.246571	0.267175	0.256422	0.22475	0.239329	0.237734	0.246449	0.263996	0.246318	0.237807	0.240126	0.242922	0.253879	0.212751	0.212104	0.263955	0.247172	0.218981	0.209739
Trichoptera	Ptilocolepidae	Ptilocolepus granulatus	0.258373	0.253589	0.255981	0.246411	0.251196	0.238038	0.246411	0.26555	0.192584	0.243421	0.238437	0.258971	0.212919	0.236842	0.258373	0.245215	0.232057	0.231659	0.241606	0.239234	0.229665	0.257177	0.241627	0.247608	0.259569	0.267344	0.270335	0.268341	0.296651	0.279904	0.270335	0.236842	0.272727	0.267943	0.291866	0.308271	0.258971	0.268242	0.267943	0.276715	0.258373	0.251196	0.251196	0.279904	0.287081	0.246411	0.250133
Trichoptera	Rhyacophilidae	Rhyacophila adjuncta	0.211626	0.202128	0.198328	0.24772	0.211626	0.227204	0.229737	0.216565	0.18845	0.235942	0.211572	0.23005	0.195289	0.202128	0.211626	0.209781	0.201368	0.21074	0.213727	0.229863	0.231383	0.226254	0.212766	0.222454	0.223024	0.232523	0.220365	0.256201	0.255699	0.268823	0.231383	0.225629	0.235942	0.245061	0.237335	0.257335	0.241261	0.245536	0.24734	0.238855	0.224924	0.25038	0.215426	0.30323	0.232903	0.228723	0.212724
Trichoptera	Rhyacophilidae	Rhyacophila dorsalis	0.198328	0.197188	0.18769	0.223784	0.207447	0.211626	0.225684	0.218085	0.18731	0.235562	0.220749	0.225335	0.192629	0.18997	0.203267	0.198824	0.198328	0.20618	0.196542	0.214666	0.216185	0.232713	0.211246	0.210486	0.226064	0.220175	0.218465	0.266791	0.2481	0.254663	0.230243	0.213157	0.229103	0.25038	0.245567	0.260011	0.238412	0.251235	0.260258	0.241768	0.202508	0.237462	0.198328	0.290072	0.230699	0.214666	0.211373
Trichoptera	Rhyacophilidae	Rhyacophila dorsalis albarracina	0.220096	0.220096	0.191388	0.236842	0.222488	0.221292	0.232057	0.222488	0.187799	0.25299	0.22488	0.23445	0.212919	0.212919	0.222488	0.203349	0.205742	0.222887	0.206464	0.232057	0.23445	0.259868	0.229665	0.22488	0.230861	0.255981	0.242225	0.289075	0.267943	0.26555	0.251196	0.239234	0.258373	0.279904	0.27193	0.282297	0.26555	0.2811	0.291866	0.26555	0.222488	0.246411	0.232057	0.294258	0.222488	0.241627	0.232589
Trichoptera	Rhyacophilidae	Rhyacophila evoluta	0.196049	0.179331	0.199848	0.221884	0.206687	0.201368	0.208207	0.206687	0.169453	0.226064	0.201672	0.221174	0.173252	0.196049	0.205167	0.20624	0.18541	0.202634	0.170843	0.215805	0.214286	0.227774	0.208207	0.234043	0.233283	0.24962	0.230623	0.257177	0.24772	0.268361	0.226444	0.227716	0.223404	0.240122	0.246707	0.255482	0.234043	0.241261	0.24924	0.251773	0.229483	0.215805	0.199848	0.294258	0.221884	0.203647	0.203141
Trichoptera	Rhyacophilidae	Rhyacophila intermedia	0.257656	0.227653	0.232907	0.25562	0.234249	0.23073	0.210166	0.236566	0.211461	0.254372	0.222742	0.246165	0.241641	0.226134	0.256277	0.213026	0.226931	0.252508	0.237587	0.236932	0.234539	0.23689	0.251933	0.239357	0.25819	0.266113	0.259792	0.286906	0.279177	0.272144	0.273595	0.246858	0.279102	0.267075	0.276785	0.279091	0.276292	0.269656	0.285622	0.27422	0.24606	0.264607	0.245629	0.283094	0.214752	0.254391	0.248903
Trichoptera	Rhyacophilidae	Rhyacophila laevis	0.217325	0.18845	0.210486	0.231003	0.211246	0.208207	0.221378	0.228723	0.193009	0.2519	0.223249	0.222904	0.206687	0.211246	0.224924	0.211235	0.212766	0.232523	0.229804	0.25228	0.246201	0.201938	0.237082	0.196809	0.224164	0.232523	0.237462	0.264959	0.24772	0.266679	0.265957	0.232308	0.25076	0.256839	0.251266	0.252535	0.258359	0.257599	0.259878	0.256839	0.232523	0.234043	0.218845	0.270335	0.2	0.194529	0.196555
Trichoptera	Rhyacophilidae	Rhyacophila laufferi	0.253589	0.244019	0.229665	0.270335	0.239234	0.223684	0.22807	0.239234	0.2189	0.27811	0.23445	0.242225	0.241627	0.222488	0.239234	0.223684	0.23445	0.249601	0.236813	0.236842	0.248804	0.258074	0.260766	0.239234	0.25	0.260766	0.285287	0.307416	0.296651	0.284689	0.287081	0.26555	0.299043	0.301435	0.291866	0.279904	0.296651	0.302632	0.308612	0.297448	0.248804	0.239234	0.247608	0.270335	0.205263	0.248804	0.253323
Trichoptera	Rhyacophilidae	Rhyacophila lusitanica	0.208207	0.202736	0.210182	0.233435	0.210638	0.21231	0.222695	0.202888	0.186322	0.244605	0.205982	0.233124	0.200912	0.200912	0.228875	0.194412	0.214286	0.219453	0.214691	0.217933	0.225532	0.219567	0.224924	0.217781	0.233587	0.226216	0.23693	0.267152	0.253495	0.271137	0.251064	0.22661	0.24772	0.257143	0.261196	0.260645	0.252736	0.256953	0.257143	0.256332	0.232523	0.244985	0.199088	0.27799	0.210821	0.219149	0.223404
Trichoptera	Rhyacophilidae	Rhyacophila martynovi	0.218936	0.20644	0.195731	0.232726	0.213068	0.197412	0.206289	0.209043	0.18372	0.244734	0.225153	0.232997	0.221005	0.214264	0.22904	0.200123	0.20893	0.234326	0.218551	0.236962	0.235006	0.233003	0.219259	0.224093	0.231748	0.263679	0.249606	0.266805	0.27196	0.277936	0.254905	0.230667	0.260013	0.265009	0.259215	0.26906	0.251369	0.264574	0.259577	0.253089	0.222735	0.245223	0.232903	0.296651	0.223683	0.222735	0.218329
Trichoptera	Rhyacophilidae	Rhyacophila melpomene	0.224924	0.223404	0.234802	0.238602	0.224924	0.233283	0.241135	0.223404	0.205927	0.267097	0.220857	0.249037	0.226444	0.215805	0.235562	0.215689	0.231003	0.212259	0.207327	0.215805	0.221884	0.236892	0.232523	0.235562	0.242401	0.234422	0.228343	0.269453	0.261398	0.272378	0.246201	0.238137	0.25076	0.262918	0.239108	0.267488	0.257219	0.262728	0.259878	0.251266	0.25228	0.255319	0.220365	0.270335	0.22462	0.235562	0.231847
Trichoptera	Rhyacophilidae	Rhyacophila meridionalis	0.223404	0.200608	0.215805	0.246201	0.227964	0.225684	0.227457	0.221884	0.206687	0.24962	0.213258	0.22524	0.207447	0.212006	0.214286	0.22136	0.209726	0.217832	0.217046	0.223404	0.227964	0.237652	0.234802	0.234043	0.245441	0.254939	0.237462	0.278339	0.259878	0.267734	0.228723	0.23502	0.245441	0.25304	0.25304	0.262231	0.24734	0.255224	0.270517	0.253546	0.224164	0.24924	0.205167	0.294258	0.235866	0.219605	0.22104
Trichoptera	Rhyacophilidae	Rhyacophila mocsaryi tredosensis	0.226444	0.199088	0.218085	0.220365	0.217325	0.225684	0.22847	0.219605	0.196809	0.242781	0.215932	0.238116	0.212766	0.215805	0.240122	0.230183	0.205167	0.229483	0.184849	0.226444	0.226444	0.241451	0.224924	0.231763	0.234802	0.25038	0.242781	0.260873	0.255319	0.274116	0.235562	0.228335	0.237082	0.240122	0.253293	0.262092	0.238222	0.241451	0.25076	0.254306	0.226444	0.24924	0.204407	0.296651	0.235562	0.205167	0.211246
Trichoptera	Rhyacophilidae	Rhyacophila munda	0.228644	0.220945	0.21616	0.240558	0.218193	0.218169	0.228153	0.229629	0.209992	0.263245	0.229684	0.238562	0.209331	0.210322	0.226198	0.211968	0.218721	0.224352	0.221256	0.238704	0.239717	0.251866	0.254818	0.235661	0.253359	0.240924	0.251025	0.277377	0.267267	0.260678	0.258117	0.245586	0.248561	0.271464	0.267461	0.266237	0.261313	0.271778	0.272167	0.265591	0.225332	0.249445	0.224016	0.285752	0.236415	0.233128	0.225731
Trichoptera	Rhyacophilidae	Rhyacophila nevada	0.217703	0.220096	0.203349	0.23445	0.232057	0.228469	0.229665	0.222488	0.192584	0.245813	0.212919	0.229665	0.220096	0.203349	0.215311	0.203349	0.205742	0.217305	0.206464	0.22488	0.227273	0.264653	0.229665	0.229665	0.235646	0.260766	0.256579	0.291069	0.279904	0.277512	0.253589	0.244019	0.253589	0.27512	0.278309	0.287081	0.26555	0.277811	0.294258	0.267943	0.217703	0.236842	0.239234	0.294258	0.222967	0.23445	0.235513
Trichoptera	Rhyacophilidae	Rhyacophila obelix	0.227964	0.206307	0.223404	0.227204	0.224924	0.225304	0.234296	0.226444	0.199848	0.24886	0.23802	0.234908	0.212386	0.206687	0.244681	0.220938	0.224924	0.235182	0.218665	0.25152	0.25228	0.24715	0.235942	0.219605	0.25	0.229863	0.246486	0.268966	0.25228	0.263119	0.257219	0.229622	0.245061	0.246581	0.265831	0.256087	0.255034	0.249335	0.267097	0.253926	0.226444	0.229103	0.212006	0.26555	0.229863	0.236322	0.235478
Trichoptera	Rhyacophilidae	Rhyacophila obliterata	0.26555	0.232057	0.232057	0.23445	0.240431	0.238038	0.234051	0.233254	0.208134	0.263756	0.246013	0.25	0.244019	0.233254	0.238038	0.240431	0.235646	0.248405	0.212054	0.242823	0.238038	0.264055	0.266746	0.238038	0.251196	0.269139	0.264952	0.289872	0.291866	0.282297	0.272727	0.246411	0.278708	0.282297	0.295056	0.289474	0.288278	0.283792	0.291866	0.278309	0.235646	0.255981	0.235646	0.318182	0.24378	0.248804	0.246146
Trichoptera	Rhyacophilidae	Rhyacophila occidentalis	0.202128	0.182371	0.207447	0.218845	0.197568	0.198328	0.214792	0.215805	0.167933	0.222264	0.202469	0.228562	0.193009	0.191489	0.217325	0.19717	0.208207	0.215299	0.190103	0.220365	0.224924	0.230053	0.208207	0.226444	0.237842	0.229863	0.221125	0.253373	0.238602	0.257392	0.226444	0.215586	0.209726	0.232523	0.240628	0.251048	0.231383	0.234422	0.24772	0.244174	0.217325	0.229483	0.192249	0.299043	0.21003	0.214286	0.208713
Trichoptera	Rhyacophilidae	Rhyacophila pascoei	0.227964	0.199088	0.199848	0.235562	0.217325	0.218085	0.211246	0.225684	0.208967	0.241261	0.219487	0.227365	0.205167	0.191489	0.224924	0.20548	0.208207	0.223151	0.206351	0.227964	0.229483	0.236892	0.227964	0.223404	0.25152	0.238982	0.238602	0.269959	0.25076	0.267165	0.241641	0.22306	0.240122	0.237082	0.244174	0.267894	0.25038	0.239932	0.261398	0.254813	0.208207	0.246201	0.196049	0.287081	0.231003	0.208207	0.214117
Trichoptera	Rhyacophilidae	Rhyacophila pulchra	0.218845	0.211246	0.215046	0.226444	0.191489	0.222644	0.222391	0.209726	0.18465	0.232143	0.222602	0.248389	0.215805	0.206687	0.226444	0.215527	0.224924	0.217325	0.206895	0.218845	0.223404	0.213906	0.223404	0.214286	0.239362	0.222264	0.228723	0.257187	0.25228	0.270042	0.241641	0.224492	0.244681	0.24924	0.240628	0.247606	0.243921	0.24848	0.241641	0.249747	0.224924	0.243161	0.208207	0.270335	0.211854	0.215805	0.222391
Trichoptera	Rhyacophilidae	Rhyacophila relicta	0.207461	0.199901	0.187388	0.224831	0.210326	0.21321	0.227392	0.220834	0.180197	0.235181	0.228197	0.235115	0.20316	0.194126	0.207416	0.209792	0.204027	0.210563	0.203454	0.226092	0.219793	0.238024	0.215499	0.216754	0.217989	0.226508	0.229082	0.260576	0.255632	0.261079	0.237563	0.218338	0.235087	0.243125	0.245108	0.263315	0.245382	0.244938	0.257152	0.246091	0.207978	0.242382	0.206419	0.294737	0.230738	0.218189	0.214834
Trichoptera	Rhyacophilidae	Rhyacophila sociata	0.205927	0.200608	0.197568	0.243921	0.210486	0.226444	0.230496	0.220365	0.193009	0.237462	0.213582	0.229019	0.18769	0.195289	0.205927	0.206834	0.200608	0.20694	0.213246	0.226444	0.226444	0.225494	0.211246	0.220365	0.222644	0.226064	0.213906	0.25486	0.25152	0.262363	0.228723	0.219323	0.230243	0.240122	0.23151	0.253667	0.236892	0.241071	0.24924	0.235816	0.224164	0.244681	0.209726	0.294258	0.233435	0.224924	0.20922
Trichoptera	Rhyacophilidae	Rhyacophila terpsichore	0.218845	0.206687	0.207447	0.231003	0.205167	0.216565	0.220365	0.215046	0.181611	0.226824	0.207104	0.224593	0.209726	0.196049	0.217325	0.204445	0.197568	0.222391	0.207618	0.224924	0.232523	0.225494	0.220365	0.226444	0.234802	0.231383	0.238222	0.273871	0.261398	0.257933	0.25076	0.231347	0.235562	0.24772	0.250253	0.262277	0.244301	0.25	0.262918	0.243668	0.234043	0.234043	0.217325	0.284689	0.216413	0.218845	0.212428
Trichoptera	Rhyacophilidae	Rhyacophila terrai	0.238496	0.209916	0.223552	0.248051	0.235344	0.238166	0.236062	0.233599	0.203393	0.266905	0.223741	0.230851	0.21698	0.218936	0.23806	0.230691	0.232952	0.244451	0.221787	0.245448	0.247404	0.259793	0.270117	0.235013	0.254025	0.260639	0.248143	0.295768	0.279024	0.282365	0.2599	0.248726	0.267401	0.270877	0.254323	0.271969	0.266286	0.273661	0.293153	0.268813	0.21774	0.258591	0.200684	0.294258	0.241879	0.231432	0.230245
Trichoptera	Rhyacophilidae	Rhyacophila tristis	0.205927	0.167173	0.178571	0.226444	0.193009	0.203647	0.218592	0.212006	0.164134	0.214666	0.204097	0.221223	0.201368	0.196809	0.208207	0.204175	0.192249	0.223404	0.197486	0.225684	0.221125	0.201178	0.205167	0.212766	0.241641	0.233663	0.224544	0.247509	0.230243	0.254785	0.227204	0.229222	0.221125	0.228723	0.241388	0.238345	0.221125	0.230053	0.240881	0.245441	0.225684	0.224164	0.215805	0.271531	0.208967	0.198328	0.188703
Trichoptera	Sericostomatidae	Schizopelex festiva	0.238391	0.204937	0.19928	0.235999	0.221298	0.224596	0.211304	0.218906	0.196358	0.252489	0.256159	0.269596	0.230135	0.256929	0.235633	0.255371	0.251928	0.24826	0.250446	0.266263	0.259818	0.237189	0.219853	0.205983	0.227269	0.268972	0.222435	0.250074	0.254968	0.269922	0.256347	0.258573	0.240633	0.243241	0.260816	0.263965	0.239437	0.243567	0.244039	0.247222	0.255981	0.243457	0.229014	0.283892	0.261559	0.235633	0.229365
Trichoptera	Sericostomatidae	Sericostoma pyrenaicum	0.240586	0.207044	0.212097	0.240787	0.225443	0.236135	0.234139	0.227398	0.218344	0.279116	0.270028	0.287046	0.25593	0.257926	0.261662	0.267986	0.260608	0.264705	0.258064	0.265383	0.264225	0.261404	0.236982	0.22249	0.223554	0.271322	0.22649	0.256777	0.254031	0.257285	0.273893	0.246463	0.254264	0.253324	0.264447	0.259855	0.253753	0.253148	0.25192	0.264143	0.240425	0.262401	0.25289	0.29378	0.241816	0.267293	0.262078
Trichoptera	Sericostomatidae	Sericostoma vittatum	0.241245	0.207074	0.21319	0.242056	0.223904	0.236918	0.237267	0.227525	0.221863	0.27818	0.273845	0.289459	0.263688	0.262637	0.265622	0.268894	0.268179	0.265605	0.262109	0.268681	0.267775	0.260345	0.239001	0.22358	0.221479	0.27175	0.226584	0.261132	0.25364	0.260514	0.275355	0.25015	0.256262	0.256773	0.268151	0.260073	0.254741	0.256676	0.255997	0.267718	0.238508	0.263014	0.256466	0.29366	0.243225	0.26531	0.261912
Trichoptera	Uenoidae	Thremma gallicum	0.144757	0.179711	0.197188	0.167553	0.146277	0.153116	0.168566	0.170593	0.183511	0.199088	0.234134	0.240238	0.202508	0.211626	0.226824	0.225355	0.208587	0.229103	0.238223	0.24962	0.245061	0.138488	0.137158	0.203267	0.226064	0.238222	0.232903	0.243511	0.238982	0.281988	0.25114	0.226077	0.242021	0.255699	0.242021	0.251644	0.246201	0.25285	0.234422	0.255193	0.240502	0.245061	0.245061	0.270933	0.176368	0.225304	0.228006
Trichoptera	Uenoidae	Thremma tellae	0.168304	0.225353	0.227787	0.178957	0.16777	0.153092	0.17997	0.174172	0.206222	0.239091	0.258308	0.258409	0.229912	0.239805	0.25164	0.247079	0.2373	0.242948	0.257283	0.267935	0.266739	0.17333	0.152768	0.244203	0.25425	0.261881	0.246405	0.271456	0.269244	0.286551	0.265543	0.24408	0.255665	0.268695	0.270947	0.275596	0.265652	0.26837	0.268048	0.273513	0.270328	0.249135	0.267837	0.273923	0.206164	0.239791	0.233286
[truncated: 96 more columns]
