# Supplementary material for: The InBIO barcoding initiative database: DNA barcodes of Iberian Trichoptera, documenting biodiversity for freshwater biomonitoring in a Mediterranean hotspot
Source: Biodivers Data J. 2023 Jan 19;11:e97484. doi: 10.3897/BDJ.11.e97484 (PMC10848855; doi:10.3897/BDJ.11.e97484)
Supplement: Supplementary material 4 — OTUs generated by the Refined Single Linkage algorithm (RESL,) [file bdj-11-e97484-s004.xlsx]

## Sheet: cluster_sequence-1
Supplementary material 3 - OTUs generated by the RESL algorithm
Description. OTUs generated by the RESL algorithm (Ratnasingham & Hebert 2013) in the BOLD system (Ratnasingham & Hebert 2007), respective sequence composition and Nearest Neighbour genetic distance. The data are downloaded from BOLD, without further processing.
Authors: Joana Paupério, Luis Martín, Sónia Ferreira, Jesús Martínez, Marcus A. González, Filipa M.S. Martins, Joana Veríssimo, Pamela Puppo, Joana C. Pinto, Cátia Chaves, Catarina Pinho, José Manuel Grosso-Silva, Lorenzo Quaglietta, Pedro Sousa, Ana Filipa Filipe, Paulo Célio Alves, Nuno Fonseca, Pedro Beja
OTU	Mean	Max	Count	NN Dist
OTU-1	0.254842	0.764526	6	14.9847
OTU-2	0.764526	1.22324	5	15.9021
OTU-3	0.713558	1.37615	9	7.64526
OTU-4	0.560652	1.68196	6	3.21101
OTU-5	0.0764526	0.152905	4	8.56269
OTU-6	0	0	1	7.49235
OTU-7	0.214067	0.458716	5	2.44648
OTU-8	1.25382	2.14067	6	6.72783
OTU-9	0.703364	1.37615	5	11.9266
OTU-10	0.101937	0.152905	3	4.74006
OTU-11	0	0	1	4.74006
OTU-12	0.453545	0.724638	3	13.1498
OTU-13	0	0	2	2.75229
OTU-14	0.14345	0.483092	10	11.0092
OTU-15	0.504091	1.44928	7	11.7737
OTU-16	0.958206	1.68196	6	8.56269
OTU-17	0.278506	0.458716	8	12.844
OTU-18	0.377629	0.917431	12	17.737
OTU-19	0.795107	1.52905	5	2.9052
OTU-20	0.203874	0.30581	3	10.3976
OTU-21	0.815494	1.07034	3	11.0092
OTU-22	0.764526	0.764526	2	9.48012
OTU-23	0	0	7	13.9144
OTU-24	0.203874	0.30581	3	8.8685
OTU-25	0.0933682	0.241546	6	16.9725
OTU-26	0	0	1	16.5138
OTU-27	0.0509684	0.152905	4	4.89297
OTU-28	1.68196	1.68196	2	4.89297
OTU-29	1.15383	1.93237	8	9.93884
OTU-30	0.397554	0.764526	5	12.5382
OTU-31	0.152905	0.152905	2	18.8073
OTU-32	0	0	4	15.942
OTU-33	0.101937	0.152905	3	17.3579
OTU-34	0.30581	0.458716	4	13.7615
OTU-35	0.163669	0.30581	7	15.2905
OTU-36	0.519878	0.917431	5	10.5505
OTU-37	0.524246	1.37615	7	9.02141
OTU-38	1.04374	1.52905	4	6.72783
OTU-39	0.101937	0.152905	3	11.4679
OTU-40	0.0764526	0.152905	4	12.0795
OTU-41	0.203874	0.30581	3	13.7615
OTU-42	0.586137	0.917431	4	11.315
OTU-43	0.764526	0.764526	2	3.0581
OTU-44	0.203874	0.30581	3	10.8563
OTU-45	0.183486	0.458716	5	7.00483
OTU-46	0	0	1	12.2324
OTU-47	0.101937	0.152905	3	8.69565
OTU-48	1.6208	2.59939	6	15.7492
OTU-49	0.152905	0.152905	2	16.055
OTU-50	0	0	1	8.25688
OTU-51	0	0	1	16.129
OTU-52	0.203874	0.30581	4	10.3976
OTU-53	0.887552	2.44648	16	2.75229
OTU-54	0	0	1	17.737
OTU-55	0	0	1	8.69565
OTU-56	0	0	5	19.419
OTU-57	0.611621	0.611621	2	11.6208
OTU-58	0.101937	0.152905	3	12.2324
OTU-59	0.178389	0.30581	4	9.02141
OTU-60	0.152905	0.30581	4	14.7343
OTU-61	0	0	1	8.7156
OTU-62	0.560652	1.68196	6	11.9266
OTU-63	0.644122	0.966184	3	14.0097
OTU-64	0.152905	0.152905	2	12.6911
OTU-65	0	0	4	10.8563
OTU-66	0.30581	0.458716	3	11.6208
OTU-67	0.458716	0.458716	2	15.9021
OTU-68	0.993884	1.52905	4	14.526
OTU-69	0	0	1	3.0581
OTU-70	0	0	1	2.75229
OTU-71	0	0	1	3.38164
OTU-72	0	0	2	13.4557
OTU-73	1.07034	1.07034	2	6.76328
OTU-74	1.48318	2.14067	5	2.75229
OTU-75	0	0	1	6.88073
OTU-76	0.101937	0.152905	4	11.315
OTU-77	0.323539	0.917431	5	3.51682
OTU-78	0.203874	0.30581	3	7.48792
OTU-79	0	0	4	14.9847
OTU-80	0.611621	0.611621	2	9.93884
OTU-81	0	0	1	16.5138
OTU-82	0	0	1	11.1621
OTU-83	0.30581	0.30581	2	7.49235
OTU-84	0	0	1	9.48012
OTU-85	0.152905	0.152905	2	2.9052
OTU-86	0	0	1	8.7156
OTU-87	0	0	1	10.2446
OTU-88	0	0	1	10.628
OTU-89	0	0	1	11.315
OTU-90	1.47808	1.68196	3	12.844
OTU-91	0.840979	1.22324	4	17.2783
OTU-92	0.152905	0.152905	2	11.315
OTU-93	0.203874	0.30581	3	14.3731
OTU-94	0	0	2	15.5963
OTU-95	0.152905	0.30581	4	18.6544
OTU-96	0	0	1	10.3976
OTU-97	0.331295	0.458716	4	8.40979
OTU-98	0	0	1	6.72783
OTU-99	0	0	1	12.2324
OTU-100	0	0	2	6.76328
OTU-101	0	0	1	8.25688
OTU-102	0	0	1	7.49235
OTU-103	0	0	1	2.657
OTU-104	0	0	1	12.6911
OTU-105	0	0	2	6.26911
OTU-106	0.30581	0.458716	3	8.56269
OTU-107	0	0	2	14.0673
OTU-108	0	0	1	12.5382
OTU-109	0	0	1	19.2661
OTU-110	0	0	1	18.8073
OTU-111	0.241546	0.241546	2	8.56269
OTU-112	0.152905	0.152905	2	10.0917
OTU-113	0	0	1	7.49235
OTU-114	0	0	1	3.38164
OTU-115	0	0	1	14.3731
OTU-116	0	0	1	7.64526
OTU-117	0	0	1	3.86473
OTU-118	0	0	1	21.256
OTU-119	0	0	2	3.21101
OTU-120	0	0	1	12.3188
OTU-121	0	0	1	3.21101
OTU-122	0	0	1	12.6911
OTU-123	0	0	1	2.44648
OTU-124	0	0	1	11.315
OTU-125	0	0	3	8.25688
OTU-126	0.101937	0.152905	3	10.3976
OTU-127	0	0	1	3.21101
OTU-128	0	0	1	11.4679
OTU-129	0	0	1	12.844
OTU-130	0	0	1	13.9144
OTU-131	0	0	1	7.00483
OTU-132	0	0	1	11.6208
OTU-133	0	0	1	2.657
OTU-134	0	0	1	2.657
OTU-135	1.20773	1.20773	2	9.90338
OTU-136	0.483092	0.724638	3	12.0773
OTU-137	0	0	1	12.3188
OTU-138	0.364904	0.611621	3	12.9969
OTU-139	0.152905	0.152905	2	10.7034
OTU-140	0	0	3	1.68196
OTU-141	0	0	2	1.68196
OTU-142	0	0	1	1.68196
OTU-143	0	0	3	1.44928
OTU-144	0.407747	0.611621	3	1.44928
OTU-145	0	0	2	1.22324
OTU-146	0.101937	0.152905	3	1.22324
OTU-147	0	0	1	13.3028
OTU-148	0	0	1	13.6086
OTU-149	0	0	1	11.9266
OTU-150	0	0	1	6.26911
OTU-151	0	0	1	11.9266
OTU-152	0	0	1	14.0097
OTU-153	0.152905	0.152905	2	8.8685
OTU-154	0	0	1	11.315

## Sheet: cluster_sequence
OTU	Process ID	Sampleid	Mean	Max	Family	Taxon	Count	NN Dist
OTU-1	IBITR001-16	INV02950	0.254842	0.764526	Leptoceridae	Ceraclea sobradieli	6	14.9847
OTU-1	IBITR128-20	INV02948	0.254842	0.764526	Leptoceridae	Ceraclea sobradieli	6	14.9847
OTU-1	IBITR191-20	INV04510	0.254842	0.764526	Leptoceridae	Ceraclea sobradieli	6	14.9847
OTU-1	IBITR196-20	INV04554	0.254842	0.764526	Leptoceridae	Ceraclea sobradieli	6	14.9847
OTU-1	IBITR334-20	INV05474	0.254842	0.764526	Leptoceridae	Ceraclea sobradieli	6	14.9847
OTU-1	IBITR344-20	INV05484	0.254842	0.764526	Leptoceridae	Ceraclea sobradieli	6	14.9847
OTU-2	IBITR002-16	INV00009	0.764526	1.22324	Lepidostomatidae	Lepidostoma hirtum	5	15.9021
OTU-2	IBITR003-16	INV00010	0.764526	1.22324	Lepidostomatidae	Lepidostoma hirtum	5	15.9021
OTU-2	IBITR004-16	INV00011	0.764526	1.22324	Lepidostomatidae	Lepidostoma hirtum	5	15.9021
OTU-2	IBITR202-20	INV04579	0.764526	1.22324	Lepidostomatidae	Lepidostoma hirtum	5	15.9021
OTU-2	IBITR204-20	INV04584	0.764526	1.22324	Lepidostomatidae	Lepidostoma hirtum	5	15.9021
OTU-3	IBITR005-16	INV00012	0.713558	1.37615	Leptoceridae	Adicella reducta	9	7.64526
OTU-3	IBITR006-16	INV00013	0.713558	1.37615	Leptoceridae	Adicella reducta	9	7.64526
OTU-3	IBITR007-16	INV00014	0.713558	1.37615	Leptoceridae	Adicella reducta	9	7.64526
OTU-3	IBITR038-20	INV00422	0.713558	1.37615	Leptoceridae	Adicella reducta	9	7.64526
OTU-3	IBITR041-20	INV00426	0.713558	1.37615	Leptoceridae	Adicella reducta	9	7.64526
OTU-3	IBITR053-20	INV00470	0.713558	1.37615	Leptoceridae	Adicella reducta	9	7.64526
OTU-3	IBITR058-20	INV00482	0.713558	1.37615	Leptoceridae	Adicella reducta	9	7.64526
OTU-3	IBITR106-20	INV02475	0.713558	1.37615	Leptoceridae	Adicella reducta	9	7.64526
OTU-3	IBITR325-20	INV04856	0.713558	1.37615	Leptoceridae	Adicella reducta	9	7.64526
OTU-4	IBITR008-16	INV00021	0.560652	1.68196	Odontoceridae	Odontocerum albicorne	6	3.21101
OTU-4	IBITR013-20	INV00020	0.560652	1.68196	Odontoceridae	Odontocerum albicorne	6	3.21101
OTU-4	IBITR426-20	INV05968	0.560652	1.68196	Odontoceridae	Odontocerum albicorne	6	3.21101
OTU-4	IBITR427-20	INV05970	0.560652	1.68196	Odontoceridae	Odontocerum albicorne	6	3.21101
OTU-4	IBITR428-20	INV05971	0.560652	1.68196	Odontoceridae	Odontocerum albicorne	6	3.21101
OTU-4	IBITR429-20	INV05972	0.560652	1.68196	Odontoceridae	Odontocerum albicorne	6	3.21101
OTU-5	IBITR009-16	INV00056	0.0764526	0.152905	Thremmatidae	Thremma gallicum	4	8.56269
OTU-5	IBITR010-16	INV00057	0.0764526	0.152905	Thremmatidae	Thremma gallicum	4	8.56269
OTU-5	IBITR011-16	INV00058	0.0764526	0.152905	Thremmatidae	Thremma gallicum	4	8.56269
OTU-5	IBITR412-20	INV05950	0.0764526	0.152905	Thremmatidae	Thremma gallicum	4	8.56269
OTU-6	IBITR012-20	INV00005	0	0	Helicopsychidae	Helicopsyche lusitanica	1	7.49235
OTU-7	IBITR014-20	INV00022	0.214067	0.458716	Philopotamidae	Philopotamus perversus	5	2.44648
OTU-7	IBITR015-20	INV00023	0.214067	0.458716	Philopotamidae	Philopotamus perversus	5	2.44648
OTU-7	IBITR016-20	INV00024	0.214067	0.458716	Philopotamidae	Philopotamus perversus	5	2.44648
OTU-7	IBITR017-20	INV00025	0.214067	0.458716	Philopotamidae	Philopotamus perversus	5	2.44648
OTU-7	IBITR403-20	INV05835	0.214067	0.458716	Philopotamidae	Philopotamus perversus	5	2.44648
OTU-8	IBITR018-20	INV00035	1.25382	2.14067	Rhyacophilidae	Rhyacophila adjuncta	6	6.72783
OTU-8	IBITR031-20	INV00330	1.25382	2.14067	Rhyacophilidae	Rhyacophila adjuncta	6	6.72783
OTU-8	IBITR209-20	INV04677	1.25382	2.14067	Rhyacophilidae	Rhyacophila adjuncta	6	6.72783
OTU-8	IBITR210-20	INV04678	1.25382	2.14067	Rhyacophilidae	Rhyacophila adjuncta	6	6.72783
OTU-8	IBITR384-20	INV05808	1.25382	2.14067	Rhyacophilidae	Rhyacophila sociata	6	6.72783
OTU-8	IBITR385-20	INV05809	1.25382	2.14067	Rhyacophilidae	Rhyacophila sociata	6	6.72783
OTU-9	IBITR019-20	INV00039	0.703364	1.37615	Rhyacophilidae	Rhyacophila lusitanica	5	11.9266
OTU-9	IBITR134-20	INV02967	0.703364	1.37615	Rhyacophilidae	Rhyacophila lusitanica	5	11.9266
OTU-9	IBITR138-20	INV03379	0.703364	1.37615	Rhyacophilidae	Rhyacophila lusitanica	5	11.9266
OTU-9	IBITR150-20	INV03633	0.703364	1.37615	Rhyacophilidae	Rhyacophila lusitanica	5	11.9266
OTU-9	IBITR362-20	INV05504	0.703364	1.37615	Rhyacophilidae	Rhyacophila lusitanica	5	11.9266
OTU-10	IBITR020-20	INV00044	0.101937	0.152905	Rhyacophilidae	Rhyacophila obelix	3	4.74006
OTU-10	IBITR410-20	INV05947	0.101937	0.152905	Rhyacophilidae	Rhyacophila obelix	3	4.74006
OTU-10	IBITR411-20	INV05949	0.101937	0.152905	Rhyacophilidae	Rhyacophila obelix	3	4.74006
OTU-11	IBITR021-20	INV00045	0	0	Rhyacophilidae	Rhyacophila obelix	1	4.74006
OTU-12	IBITR022-20	INV00053	0.453545	0.724638	Sericostomatidae	Schizopelex festiva	3	13.1498
OTU-12	IBITR023-20	INV00054	0.453545	0.724638	Sericostomatidae	Schizopelex festiva	3	13.1498
OTU-12	IBITR065-20	INV00513	0.453545	0.724638	Sericostomatidae	Schizopelex festiva	3	13.1498
OTU-13	IBITR024-20	INV00184	0	0	Leptoceridae	Ceraclea albimacula	2	2.75229
OTU-13	IBITR084-20	INV02233	0	0	Leptoceridae	Ceraclea albimacula	2	2.75229
OTU-14	IBITR025-20	INV00186	0.14345	0.483092	Hydropsychidae	Hydropsyche siltalai	10	11.0092
OTU-14	IBITR049-20	INV00460	0.14345	0.483092	Hydropsychidae	Hydropsyche siltalai	10	11.0092
OTU-14	IBITR132-20	INV02962	0.14345	0.483092	Hydropsychidae	Hydropsyche pictetorum	10	11.0092
OTU-14	IBITR151-20	INV03635	0.14345	0.483092	Hydropsychidae	Hydropsyche ambigua	10	11.0092
OTU-14	IBITR160-20	INV03680	0.14345	0.483092	Hydropsychidae	Hydropsyche siltalai	10	11.0092
OTU-14	IBITR175-20	INV04269	0.14345	0.483092	Hydropsychidae	Hydropsyche siltalai	10	11.0092
OTU-14	IBITR293-20	INV04789	0.14345	0.483092	Hydropsychidae	Hydropsyche infernalis	10	11.0092
OTU-14	IBITR341-20	INV05481	0.14345	0.483092	Hydropsychidae	Hydropsyche siltalai	10	11.0092
OTU-14	IBITR342-20	INV05482	0.14345	0.483092	Hydropsychidae	Hydropsyche siltalai	10	11.0092
OTU-14	IBITR354-20	INV05494	0.14345	0.483092	Hydropsychidae	Hydropsyche siltalai	10	11.0092
OTU-15	IBITR026-20	INV00318	0.504091	1.44928	Hydropsychidae	Hydropsyche tenuis	7	11.7737
OTU-15	IBITR245-20	INV04720	0.504091	1.44928	Hydropsychidae	Hydropsyche ambigua	7	11.7737
OTU-15	IBITR246-20	INV04721	0.504091	1.44928	Hydropsychidae	Hydropsyche ambigua	7	11.7737
OTU-15	IBITR249-20	INV04724	0.504091	1.44928	Hydropsychidae	Hydropsyche siltalai	7	11.7737
OTU-15	IBITR340-20	INV05480	0.504091	1.44928	Hydropsychidae	Hydropsyche ambigua	7	11.7737
OTU-15	IBITR353-20	INV05493	0.504091	1.44928	Hydropsychidae	Hydropsyche ambigua	7	11.7737
OTU-15	IBITR420-20	INV05960	0.504091	1.44928	Hydropsychidae	Hydropsyche ambigua	7	11.7737
OTU-16	IBITR028-20	INV00321	0.958206	1.68196	Limnephilidae	Allogamus ligonifer	6	8.56269
OTU-16	IBITR093-20	INV02462	0.958206	1.68196	Limnephilidae	Allogamus ligonifer	6	8.56269
OTU-16	IBITR097-20	INV02466	0.958206	1.68196	Limnephilidae	Allogamus ligonifer	6	8.56269
OTU-16	IBITR164-20	INV03724	0.958206	1.68196	Limnephilidae	Allogamus ligonifer	6	8.56269
OTU-16	IBITR167-20	INV03727	0.958206	1.68196	Limnephilidae	Allogamus ligonifer	6	8.56269
OTU-16	IBITR264-20	INV04748	0.958206	1.68196	Limnephilidae	Allogamus ligonifer	6	8.56269
OTU-17	IBITR027-20	INV00320	0.278506	0.458716	Goeridae	Larcasia partita	8	12.844
OTU-17	IBITR029-20	INV00327	0.278506	0.458716	Goeridae	Larcasia partita	8	12.844
OTU-17	IBITR030-20	INV00329	0.278506	0.458716	Goeridae	Larcasia partita	8	12.844
OTU-17	IBITR034-20	INV00341	0.278506	0.458716	Goeridae	Larcasia partita	8	12.844
OTU-17	IBITR047-20	INV00451	0.278506	0.458716	Goeridae	Larcasia partita	8	12.844
OTU-17	IBITR104-20	INV02473	0.278506	0.458716	Goeridae	Larcasia partita	8	12.844
OTU-17	IBITR105-20	INV02474	0.278506	0.458716	Goeridae	Larcasia partita	8	12.844
OTU-17	IBITR254-20	INV04733	0.278506	0.458716	Goeridae	Larcasia partita	8	12.844
OTU-18	IBITR035-20	INV00417	0.377629	0.917431	Philopotamidae	Chimarra marginata	12	17.737
OTU-18	IBITR036-20	INV00419	0.377629	0.917431	Philopotamidae	Chimarra marginata	12	17.737
OTU-18	IBITR039-20	INV00424	0.377629	0.917431	Philopotamidae	Chimarra marginata	12	17.737
OTU-18	IBITR040-20	INV00425	0.377629	0.917431	Philopotamidae	Chimarra marginata	12	17.737
OTU-18	IBITR043-20	INV00431	0.377629	0.917431	Philopotamidae	Chimarra marginata	12	17.737
OTU-18	IBITR044-20	INV00432	0.377629	0.917431	Philopotamidae	Chimarra marginata	12	17.737
OTU-18	IBITR060-20	INV00486	0.377629	0.917431	Philopotamidae	Chimarra marginata	12	17.737
OTU-18	IBITR064-20	INV00506	0.377629	0.917431	Philopotamidae	Chimarra marginata	12	17.737
OTU-18	IBITR091-20	INV02459	0.377629	0.917431	Philopotamidae	Chimarra marginata	12	17.737
OTU-18	IBITR092-20	INV02461	0.377629	0.917431	Philopotamidae	Chimarra marginata	12	17.737
OTU-18	IBITR136-20	INV03259	0.377629	0.917431	Philopotamidae	Chimarra marginata	12	17.737
OTU-18	IBITR331-20	INV05457	0.377629	0.917431	Philopotamidae	Chimarra marginata	12	17.737
OTU-19	IBITR032-20	INV00334	0.795107	1.52905	Philopotamidae	Philopotamus montanus caurelensis	5	2.9052
OTU-19	IBITR033-20	INV00336	0.795107	1.52905	Philopotamidae	Philopotamus montanus caurelensis	5	2.9052
OTU-19	IBITR096-20	INV02465	0.795107	1.52905	Philopotamidae	Philopotamus montanus caurelensis	5	2.9052
OTU-19	IBITR102-20	INV02471	0.795107	1.52905	Philopotamidae	Philopotamus montanus caurelensis	5	2.9052
OTU-19	IBITR107-20	INV02476	0.795107	1.52905	Philopotamidae	Philopotamus montanus caurelensis	5	2.9052
OTU-20	IBITR042-20	INV00427	0.203874	0.30581	Psychomyiidae	Psychomyia pusilla	3	10.3976
OTU-20	IBITR070-20	INV00806	0.203874	0.30581	Psychomyiidae	Psychomyia pusilla	3	10.3976
OTU-20	IBITR355-20	INV05495	0.203874	0.30581	Psychomyiidae	Psychomyia pusilla	3	10.3976
OTU-21	IBITR037-20	INV00421	0.815494	1.07034	Hydropsychidae	Hydropsyche pictetorum	3	11.0092
OTU-21	IBITR294-20	INV04790	0.815494	1.07034	Hydropsychidae	Hydropsyche pictetorum	3	11.0092
OTU-21	IBITR363-20	INV05505	0.815494	1.07034	Hydropsychidae	Hydropsyche pictetorum	3	11.0092
OTU-22	IBITR048-20	INV00458	0.764526	0.764526	Philopotamidae	Philopotamus variegatus	2	9.48012
OTU-22	IBITR051-20	INV00465	0.764526	0.764526	Philopotamidae	Philopotamus variegatus	2	9.48012
OTU-23	IBITR045-20	INV00433	0	0	Hydropsychidae	Hydropsyche exocellata	7	13.9144
OTU-23	IBITR046-20	INV00434	0	0	Hydropsychidae	Hydropsyche exocellata	7	13.9144
OTU-23	IBITR111-20	INV02678	0	0	Hydropsychidae	Hydropsyche exocellata	7	13.9144
OTU-23	IBITR121-20	INV02920	0	0	Hydropsychidae	Hydropsyche exocellata	7	13.9144
OTU-23	IBITR123-20	INV02922	0	0	Hydropsychidae	Hydropsyche exocellata	7	13.9144
OTU-23	IBITR135-20	INV02979	0	0	Hydropsychidae	Hydropsyche exocellata	7	13.9144
OTU-23	IBITR289-20	INV04785	0	0	Hydropsychidae	Hydropsyche exocellata	7	13.9144
OTU-24	IBITR054-20	INV00475	0.203874	0.30581	Brachycentridae	Micrasema moestum	3	8.8685
OTU-24	IBITR055-20	INV00476	0.203874	0.30581	Brachycentridae	Micrasema moestum	3	8.8685
OTU-24	IBITR056-20	INV00477	0.203874	0.30581	Brachycentridae	Micrasema moestum	3	8.8685
OTU-25	IBITR050-20	INV00461	0.0933682	0.241546	Glossosomatidae	Glossosoma privatum	6	16.9725
OTU-25	IBITR052-20	INV00468	0.0933682	0.241546	Glossosomatidae	Glossosoma privatum	6	16.9725
OTU-25	IBITR219-20	INV04688	0.0933682	0.241546	Glossosomatidae	Glossosoma privatum	6	16.9725
OTU-25	IBITR220-20	INV04689	0.0933682	0.241546	Glossosomatidae	Glossosoma privatum	6	16.9725
OTU-25	IBITR400-20	INV05830	0.0933682	0.241546	Glossosomatidae	Glossosoma privatum	6	16.9725
OTU-25	IBITR401-20	INV05831	0.0933682	0.241546	Glossosomatidae	Glossosoma privatum	6	16.9725
OTU-26	IBITR059-20	INV00485	0	0	Psychomyiidae	Lype phaeopa	1	16.5138
OTU-27	IBITR057-20	INV00478	0.0509684	0.152905	Polycentropodidae	Polycentropus kingi	4	4.89297
OTU-27	IBITR234-20	INV04708	0.0509684	0.152905	Polycentropodidae	Polycentropus kingi	4	4.89297
OTU-27	IBITR235-20	INV04709	0.0509684	0.152905	Polycentropodidae	Polycentropus kingi	4	4.89297
OTU-27	IBITR357-20	INV05498	0.0509684	0.152905	Polycentropodidae	Polycentropus kingi	4	4.89297
OTU-28	IBITR062-20	INV00503	1.68196	1.68196	Polycentropodidae	Polycentropus flavomaculatus	2	4.89297
OTU-28	IBITR063-20	INV00504	1.68196	1.68196	Polycentropodidae	Polycentropus flavomaculatus	2	4.89297
OTU-29	IBITR061-20	INV00491	1.15383	1.93237	Psychomyiidae	Tinodes waeneri	8	9.93884
OTU-29	IBITR077-20	INV01280	1.15383	1.93237	Psychomyiidae	Tinodes waeneri	8	9.93884
OTU-29	IBITR187-20	INV04423	1.15383	1.93237	Psychomyiidae	Tinodes waeneri	8	9.93884
OTU-29	IBITR188-20	INV04500	1.15383	1.93237	Psychomyiidae	Tinodes waeneri	8	9.93884
OTU-29	IBITR200-20	INV04576	1.15383	1.93237	Psychomyiidae	Tinodes waeneri	8	9.93884
OTU-29	IBITR203-20	INV04581	1.15383	1.93237	Psychomyiidae	Tinodes waeneri	8	9.93884
OTU-29	IBITR281-20	INV04776	1.15383	1.93237	Psychomyiidae	Tinodes waeneri	8	9.93884
OTU-29	IBITR282-20	INV04777	1.15383	1.93237	Psychomyiidae	Tinodes waeneri	8	9.93884
OTU-30	IBITR067-20	INV00521	0.397554	0.764526	Psychomyiidae	Tinodes assimilis	5	12.5382
OTU-30	IBITR076-20	INV01260	0.397554	0.764526	Psychomyiidae	Tinodes assimilis	5	12.5382
OTU-30	IBITR122-20	INV02921	0.397554	0.764526	Psychomyiidae	Tinodes assimilis	5	12.5382
OTU-30	IBITR241-20	INV04716	0.397554	0.764526	Psychomyiidae	Tinodes assimilis	5	12.5382
OTU-30	IBITR242-20	INV04717	0.397554	0.764526	Psychomyiidae	Tinodes assimilis	5	12.5382
OTU-31	IBITR066-20	INV00520	0.152905	0.152905	Hydroptilidae	Ithytrichia clavata	2	18.8073
OTU-31	IBITR073-20	INV00839	0.152905	0.152905	Hydroptilidae	Ithytrichia clavata	2	18.8073
OTU-32	IBITR071-20	INV00809	0	0	Hydropsychidae	Hydropsyche bulbifera	4	15.942
OTU-32	IBITR190-20	INV04503	0	0	Hydropsychidae	Hydropsyche bulbifera	4	15.942
OTU-32	IBITR287-20	INV04782	0	0	Hydropsychidae	Hydropsyche bulbifera	4	15.942
OTU-32	IBITR288-20	INV04783	0	0	Hydropsychidae	Hydropsyche bulbifera	4	15.942
OTU-33	IBITR072-20	INV00812	0.101937	0.152905	Leptoceridae	Leptocerus tineiformis	3	17.3579
OTU-33	IBITR074-20	INV00846	0.101937	0.152905	Leptoceridae	Leptocerus tineiformis	3	17.3579
OTU-33	IBITR177-20	INV04287	0.101937	0.152905	Leptoceridae	Leptocerus tineiformis	3	17.3579
OTU-34	IBITR068-20	INV00549	0.30581	0.458716	Leptoceridae	Setodes argentipunctellus	4	13.7615
OTU-34	IBITR315-20	INV04817	0.30581	0.458716	Leptoceridae	Setodes argentipunctellus	4	13.7615
OTU-34	IBITR327-20	INV05352	0.30581	0.458716	Leptoceridae	Setodes argentipunctellus	4	13.7615
OTU-34	IBITR328-20	INV05353	0.30581	0.458716	Leptoceridae	Setodes argentipunctellus	4	13.7615
OTU-35	IBITR069-20	INV00561	0.163669	0.30581	Hydropsychidae	Hydropsyche lobata	7	15.2905
OTU-35	IBITR110-20	INV02669	0.163669	0.30581	Hydropsychidae	Hydropsyche lobata	7	15.2905
OTU-35	IBITR144-20	INV03591	0.163669	0.30581	Hydropsychidae	Hydropsyche lobata	7	15.2905
OTU-35	IBITR145-20	INV03592	0.163669	0.30581	Hydropsychidae	Hydropsyche lobata	7	15.2905
OTU-35	IBITR189-20	INV04501	0.163669	0.30581	Hydropsychidae	Hydropsyche lobata	7	15.2905
OTU-35	IBITR290-20	INV04786	0.163669	0.30581	Hydropsychidae	Hydropsyche lobata	7	15.2905
OTU-35	IBITR291-20	INV04787	0.163669	0.30581	Hydropsychidae	Hydropsyche lobata	7	15.2905
OTU-36	IBITR079-20	INV01284	0.519878	0.917431	Limnephilidae	Limnephilus sparsus	5	10.5505
OTU-36	IBITR153-20	INV03651	0.519878	0.917431	Limnephilidae	Limnephilus sparsus	5	10.5505
OTU-36	IBITR154-20	INV03653	0.519878	0.917431	Limnephilidae	Limnephilus sparsus	5	10.5505
OTU-36	IBITR171-20	INV04258	0.519878	0.917431	Limnephilidae	Limnephilus sparsus	5	10.5505
OTU-36	IBITR255-20	INV04738	0.519878	0.917431	Limnephilidae	Limnephilus sparsus	5	10.5505
OTU-37	IBITR080-20	INV01299	0.524246	1.37615	Limnephilidae	Potamophylax cingulatus	7	9.02141
OTU-37	IBITR087-20	INV02247	0.524246	1.37615	Limnephilidae	Potamophylax cingulatus	7	9.02141
OTU-37	IBITR088-20	INV02253	0.524246	1.37615	Limnephilidae	Potamophylax cingulatus	7	9.02141
OTU-37	IBITR090-20	INV02257	0.524246	1.37615	Limnephilidae	Potamophylax cingulatus	7	9.02141
OTU-37	IBITR103-20	INV02472	0.524246	1.37615	Limnephilidae	Potamophylax cingulatus	7	9.02141
OTU-37	IBITR118-20	INV02800	0.524246	1.37615	Limnephilidae	Potamophylax cingulatus	7	9.02141
OTU-37	IBITR258-20	INV04741	0.524246	1.37615	Limnephilidae	Potamophylax cingulatus	7	9.02141
OTU-38	IBITR075-20	INV01163	1.04374	1.52905	Glossosomatidae	Agapetus segovicus	4	6.72783
OTU-38	IBITR317-20	INV04819	1.04374	1.52905	Glossosomatidae	Agapetus segovicus	4	6.72783
OTU-38	IBITR394-20	INV05818	1.04374	1.52905	Glossosomatidae	Agapetus segovicus	4	6.72783
OTU-38	IBITR395-20	INV05819	1.04374	1.52905	Glossosomatidae	Agapetus segovicus	4	6.72783
OTU-39	IBITR078-20	INV01281	0.101937	0.152905	Limnephilidae	Limnephilus hirsutus	3	11.4679
OTU-39	IBITR155-20	INV03655	0.101937	0.152905	Limnephilidae	Limnephilus hirsutus	3	11.4679
OTU-39	IBITR161-20	INV03685	0.101937	0.152905	Limnephilidae	Limnephilus hirsutus	3	11.4679
OTU-40	IBITR083-20	INV01836	0.0764526	0.152905	Limnephilidae	Halesus radiatus	4	12.0795
OTU-40	IBITR100-20	INV02469	0.0764526	0.152905	Limnephilidae	Halesus radiatus	4	12.0795
OTU-40	IBITR162-20	INV03722	0.0764526	0.152905	Limnephilidae	Halesus radiatus	4	12.0795
OTU-40	IBITR260-20	INV04743	0.0764526	0.152905	Limnephilidae	Halesus radiatus	4	12.0795
OTU-41	IBITR085-20	INV02239	0.203874	0.30581	Leptoceridae	Mystacides azureus	3	13.7615
OTU-41	IBITR143-20	INV03563	0.203874	0.30581	Leptoceridae	Mystacides azureus	3	13.7615
OTU-41	IBITR316-20	INV04818	0.203874	0.30581	Leptoceridae	Mystacides azureus	3	13.7615
OTU-42	IBITR081-20	INV01300	0.586137	0.917431	Limnephilidae	Micropterna sequax	4	11.315
OTU-42	IBITR157-20	INV03662	0.586137	0.917431	Limnephilidae	Micropterna sequax	4	11.315
OTU-42	IBITR263-20	INV04746	0.586137	0.917431	Limnephilidae	Micropterna sequax	4	11.315
OTU-42	IBITR329-20	INV05388	0.586137	0.917431	Limnephilidae	Micropterna sequax	4	11.315
OTU-43	IBITR082-20	INV01598	0.764526	0.764526	Philopotamidae	Wormaldia beaumonti	2	3.0581
OTU-43	IBITR404-20	INV05836	0.764526	0.764526	Philopotamidae	Wormaldia lusitanica	2	3.0581
OTU-44	IBITR094-20	INV02463	0.203874	0.30581	Leptoceridae	Athripsodes inaequalis	3	10.8563
OTU-44	IBITR120-20	INV02919	0.203874	0.30581	Leptoceridae	Athripsodes inaequalis	3	10.8563
OTU-44	IBITR137-20	INV03273	0.203874	0.30581	Leptoceridae	Athripsodes inaequalis	3	10.8563
OTU-45	IBITR095-20	INV02464	0.183486	0.458716	Polycentropodidae	Plectrocnemia laetabilis	5	7.00483
OTU-45	IBITR184-20	INV04295	0.183486	0.458716	Polycentropodidae	Plectrocnemia laetabilis	5	7.00483
OTU-45	IBITR230-20	INV04704	0.183486	0.458716	Polycentropodidae	Plectrocnemia laetabilis	5	7.00483
OTU-45	IBITR231-20	INV04705	0.183486	0.458716	Polycentropodidae	Plectrocnemia laetabilis	5	7.00483
OTU-45	IBITR330-20	INV05389	0.183486	0.458716	Polycentropodidae	Plectrocnemia laetabilis	5	7.00483
OTU-46	IBITR086-20	INV02246	0	0	Limnephilidae	Allogamus laureatus	1	12.2324
OTU-47	IBITR089-20	INV02256	0.101937	0.152905	Limnephilidae	Limnephilus vittatus	3	8.69565
OTU-47	IBITR256-20	INV04739	0.101937	0.152905	Limnephilidae	Limnephilus vittatus	3	8.69565
OTU-47	IBITR338-20	INV05478	0.101937	0.152905	Limnephilidae	Limnephilus vittatus	3	8.69565
OTU-48	IBITR108-20	INV02477	1.6208	2.59939	Glossosomatidae	Catagapetus maclachlani	6	15.7492
OTU-48	IBITR127-20	INV02929	1.6208	2.59939	Glossosomatidae	Catagapetus maclachlani	6	15.7492
OTU-48	IBITR169-20	INV03936	1.6208	2.59939	Glossosomatidae	Catagapetus maclachlani	6	15.7492
OTU-48	IBITR397-20	INV05824	1.6208	2.59939	Glossosomatidae	Catagapetus maclachlani	6	15.7492
OTU-48	IBITR398-20	INV05825	1.6208	2.59939	Glossosomatidae	Catagapetus maclachlani	6	15.7492
OTU-48	IBITR399-20	INV05826	1.6208	2.59939	Glossosomatidae	Catagapetus maclachlani	6	15.7492
OTU-49	IBITR101-20	INV02470	0.152905	0.152905	Calamoceratidae	Calamoceras marsupus	2	16.055
OTU-49	IBITR336-20	INV05476	0.152905	0.152905	Calamoceratidae	Calamoceras marsupus	2	16.055
OTU-50	IBITR099-20	INV02468	0	0	Glossosomatidae	Agapetus fuscipes	1	8.25688
OTU-51	IBITR098-20	INV02467	0	0	Leptoceridae	Triaenodes ochreellus	1	16.129
OTU-52	IBITR115-20	INV02749	0.203874	0.30581	Psychomyiidae	Psychomyia pusilla	4	10.3976
OTU-52	IBITR236-20	INV04710	0.203874	0.30581	Psychomyiidae	Psychomyia pusilla	4	10.3976
OTU-52	IBITR237-20	INV04711	0.203874	0.30581	Psychomyiidae	Psychomyia pusilla	4	10.3976
OTU-52	IBITR350-20	INV05490	0.203874	0.30581	Psychomyiidae	Psychomyia pusilla	4	10.3976
OTU-53	IBITR113-20	INV02747	0.887552	2.44648	Sericostomatidae	Sericostoma pyrenaicum	16	2.75229
OTU-53	IBITR114-20	INV02748	0.887552	2.44648	Sericostomatidae	Sericostoma pyrenaicum	16	2.75229
OTU-53	IBITR179-20	INV04289	0.887552	2.44648	Sericostomatidae	Sericostoma pyrenaicum	16	2.75229
OTU-53	IBITR182-20	INV04292	0.887552	2.44648	Sericostomatidae	Sericostoma pyrenaicum	16	2.75229
OTU-53	IBITR265-20	INV04749	0.887552	2.44648	Sericostomatidae	Sericostoma pyrenaicum	16	2.75229
OTU-53	IBITR266-20	INV04752	0.887552	2.44648	Sericostomatidae	Sericostoma vittatum	16	2.75229
OTU-53	IBITR304-20	INV04800	0.887552	2.44648	Sericostomatidae	Sericostoma vittatum	16	2.75229
OTU-53	IBITR305-20	INV04801	0.887552	2.44648	Sericostomatidae	Sericostoma vittatum	16	2.75229
OTU-53	IBITR306-20	INV04803	0.887552	2.44648	Sericostomatidae	Sericostoma pyrenaicum	16	2.75229
OTU-53	IBITR307-20	INV04804	0.887552	2.44648	Sericostomatidae	Sericostoma pyrenaicum	16	2.75229
OTU-53	IBITR308-20	INV04805	0.887552	2.44648	Sericostomatidae	Sericostoma pyrenaicum	16	2.75229
OTU-53	IBITR309-20	INV04806	0.887552	2.44648	Sericostomatidae	Sericostoma pyrenaicum	16	2.75229
OTU-53	IBITR318-20	INV04820	0.887552	2.44648	Sericostomatidae	Sericostoma vittatum	16	2.75229
OTU-53	IBITR319-20	INV04821	0.887552	2.44648	Sericostomatidae	Sericostoma vittatum	16	2.75229
OTU-53	IBITR320-20	INV04822	0.887552	2.44648	Sericostomatidae	Sericostoma vittatum	16	2.75229
OTU-53	IBITR352-20	INV05492	0.887552	2.44648	Sericostomatidae	Sericostoma vittatum	16	2.75229
OTU-54	IBITR112-20	INV02695	0	0	Psychomyiidae	Paduniella vandeli	1	17.737
OTU-55	IBITR109-20	INV02609	0	0	Limnephilidae	Limnephilus bipunctatus	1	8.69565
OTU-56	IBITR124-20	INV02924	0	0	Hydroptilidae	Agraylea sexmaculata	5	19.419
OTU-56	IBITR125-20	INV02927	0	0	Hydroptilidae	Agraylea sexmaculata	5	19.419
OTU-56	IBITR126-20	INV02928	0	0	Hydroptilidae	Agraylea sexmaculata	5	19.419
OTU-56	IBITR142-20	INV03549	0	0	Hydroptilidae	Agraylea sexmaculata	5	19.419
OTU-56	IBITR192-20	INV04524	0	0	Hydroptilidae	Agraylea sexmaculata	5	19.419
OTU-57	IBITR117-20	INV02799	0.611621	0.611621	Limnephilidae	Grammotaulius submaculatus	2	11.6208
OTU-57	IBITR257-20	INV04740	0.611621	0.611621	Limnephilidae	Grammotaulius submaculatus	2	11.6208
OTU-58	IBITR116-20	INV02764	0.101937	0.152905	Leptoceridae	Athripsodes tavaresi	3	12.2324
OTU-58	IBITR147-20	INV03612	0.101937	0.152905	Leptoceridae	Athripsodes tavaresi	3	12.2324
OTU-58	IBITR268-20	INV04754	0.101937	0.152905	Leptoceridae	Athripsodes tavaresi	3	12.2324
OTU-59	IBITR148-20	INV03616	0.178389	0.30581	Limnephilidae	Potamophylax latipennis	4	9.02141
OTU-59	IBITR149-20	INV03624	0.178389	0.30581	Limnephilidae	Potamophylax latipennis	4	9.02141
OTU-59	IBITR152-20	INV03642	0.178389	0.30581	Limnephilidae	Potamophylax latipennis	4	9.02141
OTU-59	IBITR259-20	INV04742	0.178389	0.30581	Limnephilidae	Potamophylax latipennis	4	9.02141
OTU-60	IBITR140-20	INV03539	0.152905	0.30581	Ecnomidae	Ecnomus deceptor	4	14.7343
OTU-60	IBITR141-20	INV03546	0.152905	0.30581	Ecnomidae	Ecnomus deceptor	4	14.7343
OTU-60	IBITR146-20	INV03605	0.152905	0.30581	Ecnomidae	Ecnomus deceptor	4	14.7343
OTU-60	IBITR360-20	INV05502	0.152905	0.30581	Ecnomidae	Ecnomus deceptor	4	14.7343
OTU-61	IBITR131-20	INV02957	0	0	Limnephilidae	Stenophylax vibex	1	8.7156
OTU-62	IBITR129-20	INV02949	0.560652	1.68196	Rhyacophilidae	Rhyacophila munda	6	11.9266
OTU-62	IBITR139-20	INV03535	0.560652	1.68196	Rhyacophilidae	Rhyacophila munda	6	11.9266
OTU-62	IBITR168-20	INV03900	0.560652	1.68196	Rhyacophilidae	Rhyacophila munda	6	11.9266
OTU-62	IBITR186-20	INV04420	0.560652	1.68196	Rhyacophilidae	Rhyacophila munda	6	11.9266
OTU-62	IBITR198-20	INV04572	0.560652	1.68196	Rhyacophilidae	Rhyacophila munda	6	11.9266
OTU-62	IBITR201-20	INV04577	0.560652	1.68196	Rhyacophilidae	Rhyacophila munda	6	11.9266
OTU-63	IBITR172-20	INV04266	0.644122	0.966184	Ptilocolepidae	Ptilocolepus extensus	3	14.0097
OTU-63	IBITR221-20	INV04690	0.644122	0.966184	Ptilocolepidae	Ptilocolepus extensus	3	14.0097
OTU-63	IBITR222-20	INV04691	0.644122	0.966184	Ptilocolepidae	Ptilocolepus extensus	3	14.0097
OTU-64	IBITR173-20	INV04267	0.152905	0.152905	Beraeidae	Beraea malatebrera	2	12.6911
OTU-64	IBITR267-20	INV04753	0.152905	0.152905	Beraeidae	Beraea malatebrera	2	12.6911
OTU-65	IBITR174-20	INV04268	0	0	Leptoceridae	Athripsodes braueri	4	10.8563
OTU-65	IBITR345-20	INV05485	0	0	Leptoceridae	Athripsodes braueri	4	10.8563
OTU-65	IBITR437-20	INV06592	0	0	Leptoceridae	Athripsodes alentexanus	4	10.8563
OTU-65	IBITR438-20	INV06593	0	0	Leptoceridae	Athripsodes alentexanus	4	10.8563
OTU-66	IBITR156-20	INV03661	0.30581	0.458716	Limnephilidae	Limnephilus guadarramicus	3	11.6208
OTU-66	IBITR159-20	INV03664	0.30581	0.458716	Limnephilidae	Limnephilus guadarramicus	3	11.6208
OTU-66	IBITR170-20	INV03946	0.30581	0.458716	Limnephilidae	Limnephilus guadarramicus	3	11.6208
OTU-67	IBITR158-20	INV03663	0.458716	0.458716	Phryganeidae	Agrypnia varia	2	15.9021
OTU-67	IBITR326-20	INV05340	0.458716	0.458716	Phryganeidae	Agrypnia varia	2	15.9021
OTU-68	IBITR163-20	INV03723	0.993884	1.52905	Philopotamidae	Wormaldia variegata mattheyi	4	14.526
OTU-68	IBITR166-20	INV03726	0.993884	1.52905	Philopotamidae	Wormaldia variegata mattheyi	4	14.526
OTU-68	IBITR228-20	INV04702	0.993884	1.52905	Philopotamidae	Wormaldia variegata mattheyi	4	14.526
OTU-68	IBITR229-20	INV04703	0.993884	1.52905	Philopotamidae	Wormaldia variegata mattheyi	4	14.526
OTU-69	IBITR165-20	INV03725	0	0	Philopotamidae	Wormaldia beaumonti	1	3.0581
OTU-70	IBITR197-20	INV04556	0	0	Leptoceridae	Ceraclea albimacula	1	2.75229
OTU-71	IBITR211-20	INV04680	0	0	Rhyacophilidae	Rhyacophila intermedia	1	3.38164
OTU-72	IBITR212-20	INV04681	0	0	Rhyacophilidae	Rhyacophila melpomene	2	13.4557
OTU-72	IBITR213-20	INV04682	0	0	Rhyacophilidae	Rhyacophila melpomene	2	13.4557
OTU-73	IBITR214-20	INV04683	1.07034	1.07034	Rhyacophilidae	Rhyacophila meridionalis	2	6.76328
OTU-73	IBITR215-20	INV04684	1.07034	1.07034	Rhyacophilidae	Rhyacophila meridionalis	2	6.76328
OTU-74	IBITR178-20	INV04288	1.48318	2.14067	Sericostomatidae	Sericostoma pyrenaicum	5	2.75229
OTU-74	IBITR180-20	INV04290	1.48318	2.14067	Sericostomatidae	Sericostoma pyrenaicum	5	2.75229
OTU-74	IBITR181-20	INV04291	1.48318	2.14067	Sericostomatidae	Sericostoma pyrenaicum	5	2.75229
OTU-74	IBITR332-20	INV05472	1.48318	2.14067	Sericostomatidae	Sericostoma pyrenaicum	5	2.75229
OTU-74	IBITR366-20	INV05509	1.48318	2.14067	Sericostomatidae	Sericostoma pyrenaicum	5	2.75229
OTU-75	IBITR185-20	INV04417	0	0	Polycentropodidae	Polycentropus telifer	1	6.88073
OTU-76	IBITR193-20	INV04530	0.101937	0.152905	Limnephilidae	Mesophylax aspersus	4	11.315
OTU-76	IBITR199-20	INV04573	0.101937	0.152905	Limnephilidae	Mesophylax aspersus	4	11.315
OTU-76	IBITR207-20	INV04662	0.101937	0.152905	Limnephilidae	Mesophylax aspersus	4	11.315
OTU-76	IBITR208-20	INV04672	0.101937	0.152905	Limnephilidae	Mesophylax aspersus	4	11.315
OTU-77	IBITR194-20	INV04531	0.323539	0.917431	Rhyacophilidae	Rhyacophila relicta	5	3.51682
OTU-77	IBITR195-20	INV04532	0.323539	0.917431	Rhyacophilidae	Rhyacophila relicta	5	3.51682
OTU-77	IBITR382-20	INV05806	0.323539	0.917431	Rhyacophilidae	Rhyacophila relicta	5	3.51682
OTU-77	IBITR383-20	INV05807	0.323539	0.917431	Rhyacophilidae	Rhyacophila relicta	5	3.51682
OTU-77	IBITR434-20	INV06215	0.323539	0.917431	Rhyacophilidae	Rhyacophila relicta	5	3.51682
OTU-78	IBITR232-20	INV04706	0.203874	0.30581	Polycentropodidae	Polycentropus intricatus	3	7.48792
OTU-78	IBITR233-20	INV04707	0.203874	0.30581	Polycentropodidae	Polycentropus intricatus	3	7.48792
OTU-78	IBITR349-20	INV05489	0.203874	0.30581	Polycentropodidae	Polycentropus intricatus	3	7.48792
OTU-79	IBITR226-20	INV04698	0	0	Philopotamidae	Wormaldia corvina	4	14.9847
OTU-79	IBITR227-20	INV04699	0	0	Philopotamidae	Wormaldia corvina	4	14.9847
OTU-79	IBITR408-20	INV05840	0	0	Philopotamidae	Wormaldia corvina	4	14.9847
OTU-79	IBITR409-20	INV05841	0	0	Philopotamidae	Wormaldia corvina	4	14.9847
OTU-80	IBITR239-20	INV04714	0.611621	0.611621	Psychomyiidae	Tinodes foedellus	2	9.93884
OTU-80	IBITR240-20	INV04715	0.611621	0.611621	Psychomyiidae	Tinodes foedellus	2	9.93884
OTU-81	IBITR238-20	INV04713	0	0	Psychomyiidae	Lype auripilis	1	16.5138
OTU-82	IBITR218-20	INV04687	0	0	Rhyacophilidae	Rhyacophila pulchra	1	11.1621
OTU-83	IBITR216-20	INV04685	0.30581	0.30581	Rhyacophilidae	Rhyacophila occidentalis	2	7.49235
OTU-83	IBITR217-20	INV04686	0.30581	0.30581	Rhyacophilidae	Rhyacophila occidentalis	2	7.49235
OTU-84	IBITR225-20	INV04696	0	0	Philopotamidae	Philopotamus amphilectus	1	9.48012
OTU-85	IBITR223-20	INV04694	0.152905	0.152905	Philopotamidae	Philopotamus montanus caurelensis	2	2.9052
OTU-85	IBITR224-20	INV04695	0.152905	0.152905	Philopotamidae	Philopotamus montanus caurelensis	2	2.9052
OTU-86	IBITR262-20	INV04745	0	0	Limnephilidae	Stenophylax permistus	1	8.7156
OTU-87	IBITR261-20	INV04744	0	0	Limnephilidae	Stenophylax fissus	1	10.2446
OTU-88	IBITR270-20	INV04756	0	0	Rhyacophilidae	Rhyacophila terpsichore	1	10.628
OTU-89	IBITR269-20	INV04755	0	0	Rhyacophilidae	Rhyacophila pascoei	1	11.315
OTU-90	IBITR247-20	INV04722	1.47808	1.68196	Hydropsychidae	Hydropsyche instabilis	3	12.844
OTU-90	IBITR248-20	INV04723	1.47808	1.68196	Hydropsychidae	Hydropsyche instabilis	3	12.844
OTU-90	IBITR419-20	INV05959	1.47808	1.68196	Hydropsychidae	Hydropsyche instabilis	3	12.844
OTU-91	IBITR243-20	INV04718	0.840979	1.22324	Hydropsychidae	Diplectrona felix	4	17.2783
OTU-91	IBITR244-20	INV04719	0.840979	1.22324	Hydropsychidae	Diplectrona felix	4	17.2783
OTU-91	IBITR339-20	INV05479	0.840979	1.22324	Hydropsychidae	Diplectrona felix	4	17.2783
OTU-91	IBITR418-20	INV05957	0.840979	1.22324	Hydropsychidae	Diplectrona felix	4	17.2783
OTU-92	IBITR252-20	INV04731	0.152905	0.152905	Brachycentridae	Micrasema servatum	2	11.315
OTU-92	IBITR253-20	INV04732	0.152905	0.152905	Brachycentridae	Micrasema servatum	2	11.315
OTU-93	IBITR250-20	INV04725	0.203874	0.30581	Hydropsychidae	Hydropsyche tibialis	3	14.3731
OTU-93	IBITR251-20	INV04726	0.203874	0.30581	Hydropsychidae	Hydropsyche tibialis	3	14.3731
OTU-93	IBITR433-20	INV06211	0.203874	0.30581	Hydropsychidae	Hydropsyche tibialis	3	14.3731
OTU-94	IBITR279-20	INV04774	0	0	Psychomyiidae	Metalype fragilis	2	15.5963
OTU-94	IBITR280-20	INV04775	0	0	Psychomyiidae	Metalype fragilis	2	15.5963
OTU-95	IBITR283-20	INV04778	0.152905	0.30581	Hydropsychidae	Cheumatopsyche lepida	4	18.6544
OTU-95	IBITR284-20	INV04779	0.152905	0.30581	Hydropsychidae	Cheumatopsyche lepida	4	18.6544
OTU-95	IBITR432-20	INV06149	0.152905	0.30581	Hydropsychidae	Cheumatopsyche lepida	4	18.6544
OTU-95	IBITR436-20	INV06590	0.152905	0.30581	Hydropsychidae	Cheumatopsyche lepida	4	18.6544
OTU-96	IBITR276-20	INV04765	0	0	Philopotamidae	Wormaldia triangulifera	1	10.3976
OTU-97	IBITR277-20	INV04772	0.331295	0.458716	Polycentropodidae	Polycentropus corniger	4	8.40979
OTU-97	IBITR278-20	INV04773	0.331295	0.458716	Polycentropodidae	Polycentropus corniger	4	8.40979
OTU-97	IBITR335-20	INV05475	0.331295	0.458716	Polycentropodidae	Polycentropus corniger	4	8.40979
OTU-97	IBITR343-20	INV05483	0.331295	0.458716	Polycentropodidae	Polycentropus corniger	4	8.40979
OTU-98	IBITR274-20	INV04762	0	0	Glossosomatidae	Agapetus nimbulus	1	6.72783
OTU-99	IBITR275-20	INV04763	0	0	Glossosomatidae	Agapetus ochripes	1	12.2324
OTU-100	IBITR271-20	INV04757	0	0	Rhyacophilidae	Rhyacophila terrai	2	6.76328
OTU-100	IBITR272-20	INV04758	0	0	Rhyacophilidae	Rhyacophila terrai	2	6.76328
OTU-101	IBITR273-20	INV04759	0	0	Glossosomatidae	Agapetus incertulus	1	8.25688
OTU-102	IBITR310-20	INV04807	0	0	Rhyacophilidae	Rhyacophila evoluta	1	7.49235
OTU-103	IBITR311-20	INV04808	0	0	Rhyacophilidae	Rhyacophila martynovi	1	2.657
OTU-104	IBITR300-20	INV04796	0	0	Limnephilidae	Enoicyla pusilla	1	12.6911
OTU-105	IBITR295-20	INV04791	0	0	Limnephilidae	Drusus bolivari	2	6.26911
OTU-105	IBITR296-20	INV04792	0	0	Limnephilidae	Drusus bolivari	2	6.26911
OTU-106	IBITR297-20	INV04793	0.30581	0.458716	Limnephilidae	Allogamus mortoni	3	8.56269
OTU-106	IBITR298-20	INV04794	0.30581	0.458716	Limnephilidae	Allogamus mortoni	3	8.56269
OTU-106	IBITR299-20	INV04795	0.30581	0.458716	Limnephilidae	Allogamus mortoni	3	8.56269
OTU-107	IBITR285-20	INV04780	0	0	Hydropsychidae	Hydropsyche brevis	2	14.0673
OTU-107	IBITR286-20	INV04781	0	0	Hydropsychidae	Hydropsyche brevis	2	14.0673
OTU-108	IBITR292-20	INV04788	0	0	Hydropsychidae	Hydropsyche iberomaroccana	1	12.5382
OTU-109	IBITR337-20	INV05477	0	0	Hydroptilidae	Hydroptila fuentaldeala	1	19.2661
OTU-110	IBITR333-20	INV05473	0	0	Leptoceridae	Oecetis testacea	1	18.8073
OTU-111	IBITR324-20	INV04833	0.241546	0.241546	Thremmatidae	Thremma tellae	2	8.56269
OTU-111	IBITR356-20	INV05497	0.241546	0.241546	Thremmatidae	Thremma tellae	2	8.56269
OTU-112	IBITR322-20	INV04824	0.152905	0.152905	Helicopsychidae	Helicopsyche sp.	2	10.0917
OTU-112	IBITR323-20	INV04825	0.152905	0.152905	Helicopsychidae	Helicopsyche sp.	2	10.0917
OTU-113	IBITR321-20	INV04823	0	0	Helicopsychidae	Helicopsyche lusitanica	1	7.49235
OTU-114	IBITR313-20	INV04810	0	0	Rhyacophilidae	Rhyacophila intermedia	1	3.38164
OTU-115	IBITR312-20	INV04809	0	0	Rhyacophilidae	Rhyacophila laevis	1	14.3731
OTU-116	IBITR367-20	INV05510	0	0	Leptoceridae	Adicella meridionalis	1	7.64526
OTU-117	IBITR364-20	INV05507	0	0	Rhyacophilidae	Rhyacophila intermedia	1	3.86473
OTU-118	IBITR361-20	INV05503	0	0	Hydroptilidae	Oxyethira frici	1	21.256
OTU-119	IBITR359-20	INV05501	0	0	Odontoceridae	Odontocerum lusitanicum	2	3.21101
OTU-119	IBITR365-20	INV05508	0	0	Odontoceridae	Odontocerum lusitanicum	2	3.21101
OTU-120	IBITR358-20	INV05500	0	0	Polycentropodidae	Cyrnus cintranus	1	12.3188
OTU-121	IBITR351-20	INV05491	0	0	Glossosomatidae	Synagapetus diversus	1	3.21101
OTU-122	IBITR348-20	INV05488	0	0	Beraeidae	Beraea alva	1	12.6911
OTU-123	IBITR347-20	INV05487	0	0	Philopotamidae	Philopotamus perversus	1	2.44648
OTU-124	IBITR396-20	INV05823	0	0	Glossosomatidae	Agapetus theischingeri	1	11.315
OTU-125	IBITR391-20	INV05815	0	0	Glossosomatidae	Agapetus fuscipes	3	8.25688
OTU-125	IBITR392-20	INV05816	0	0	Glossosomatidae	Agapetus fuscipes	3	8.25688
OTU-125	IBITR393-20	INV05817	0	0	Glossosomatidae	Agapetus fuscipes	3	8.25688
OTU-126	IBITR405-20	INV05837	0.101937	0.152905	Philopotamidae	Wormaldia occipitalis	3	10.3976
OTU-126	IBITR406-20	INV05838	0.101937	0.152905	Philopotamidae	Wormaldia occipitalis	3	10.3976
OTU-126	IBITR407-20	INV05839	0.101937	0.152905	Philopotamidae	Wormaldia occipitalis	3	10.3976
OTU-127	IBITR402-20	INV05833	0	0	Glossosomatidae	Synagapetus lusitanicus	1	3.21101
OTU-128	IBITR414-20	INV05952	0	0	Brachycentridae	Micrasema cenerentola	1	11.4679
OTU-129	IBITR413-20	INV05951	0	0	Goeridae	Silo graellsii	1	12.844
OTU-130	IBITR416-20	INV05954	0	0	Psychomyiidae	Tinodes maculicornis	1	13.9144
OTU-131	IBITR415-20	INV05953	0	0	Polycentropodidae	Plectrocnemia geniculata	1	7.00483
OTU-132	IBITR374-20	INV05796	0	0	Rhyacophilidae	Rhyacophila mocsaryi tredosensis	1	11.6208
OTU-133	IBITR370-20	INV05792	0	0	Rhyacophilidae	Rhyacophila nevada	1	2.657
OTU-134	IBITR377-20	INV05799	0	0	Rhyacophilidae	Rhyacophila martynovi	1	2.657
OTU-135	IBITR375-20	INV05797	1.20773	1.20773	Rhyacophilidae	Rhyacophila obliterata	2	9.90338
OTU-135	IBITR376-20	INV05798	1.20773	1.20773	Rhyacophilidae	Rhyacophila obliterata	2	9.90338
OTU-136	IBITR379-20	INV05803	0.483092	0.724638	Rhyacophilidae	Rhyacophila munda	3	12.0773
OTU-136	IBITR380-20	INV05804	0.483092	0.724638	Rhyacophilidae	Rhyacophila munda	3	12.0773
OTU-136	IBITR381-20	INV05805	0.483092	0.724638	Rhyacophilidae	Rhyacophila munda	3	12.0773
OTU-137	IBITR378-20	INV05800	0	0	Rhyacophilidae	Rhyacophila laufferi	1	12.3188
OTU-138	IBITR388-20	INV05812	0.364904	0.611621	Glossosomatidae	Agapetus delicatulus	3	12.9969
OTU-138	IBITR389-20	INV05813	0.364904	0.611621	Glossosomatidae	Agapetus delicatulus	3	12.9969
OTU-138	IBITR390-20	INV05814	0.364904	0.611621	Glossosomatidae	Agapetus delicatulus	3	12.9969
OTU-139	IBITR386-20	INV05810	0.152905	0.152905	Rhyacophilidae	Rhyacophila tristis	2	10.7034
OTU-139	IBITR387-20	INV05811	0.152905	0.152905	Rhyacophilidae	Rhyacophila tristis	2	10.7034
OTU-140	IBITR176-20	INV04270	0	0	Sericostomatidae	Sericostoma vittatum	3	1.68196
OTU-140	IBITR183-20	INV04293	0	0	Sericostomatidae	Sericostoma pyrenaicum	3	1.68196
OTU-140	IBITR346-20	INV05486	0	0	Sericostomatidae	Sericostoma vittatum	3	1.68196
OTU-141	IBITR301-20	INV04797	0	0	Sericostomatidae	Sericostoma vittatum	2	1.68196
OTU-141	IBITR303-20	INV04799	0	0	Sericostomatidae	Sericostoma vittatum	2	1.68196
OTU-142	IBITR302-20	INV04798	0	0	Sericostomatidae	Sericostoma vittatum	1	1.68196
OTU-143	IBITR314-20	INV04811	0	0	Rhyacophilidae	Rhyacophila dorsalis	3	1.44928
OTU-143	IBITR368-20	INV05790	0	0	Rhyacophilidae	Rhyacophila dorsalis albarracina	3	1.44928
OTU-143	IBITR369-20	INV05791	0	0	Rhyacophilidae	Rhyacophila dorsalis albarracina	3	1.44928
OTU-144	IBITR371-20	INV05793	0.407747	0.611621	Rhyacophilidae	Rhyacophila dorsalis	3	1.44928
OTU-144	IBITR372-20	INV05794	0.407747	0.611621	Rhyacophilidae	Rhyacophila dorsalis	3	1.44928
OTU-144	IBITR373-20	INV05795	0.407747	0.611621	Rhyacophilidae	Rhyacophila dorsalis	3	1.44928
OTU-145	IBITR119-20	INV02900	0	0	Limnephilidae	Stenophylax mucronatus	2	1.22324
OTU-145	IBITR133-20	INV02964	0	0	Limnephilidae	Stenophylax mucronatus	2	1.22324
OTU-146	IBITR130-20	INV02951	0.101937	0.152905	Limnephilidae	Stenophylax mucronatus	3	1.22324
OTU-146	IBITR205-20	INV04655	0.101937	0.152905	Limnephilidae	Stenophylax mucronatus	3	1.22324
OTU-146	IBITR206-20	INV04656	0.101937	0.152905	Limnephilidae	Stenophylax mucronatus	3	1.22324
OTU-147	IBITR417-20	INV05956	0	0	Hydropsychidae	Hydropsyche dinarica	1	13.3028
OTU-148	IBITR421-20	INV05962	0	0	Apataniidae	Apatania theischingerorum	1	13.6086
OTU-149	IBITR422-20	INV05963	0	0	Limnephilidae	Annitella esparraguera	1	11.9266
OTU-150	IBITR423-20	INV05964	0	0	Limnephilidae	Drusus berthelemyi	1	6.26911
OTU-151	IBITR424-20	INV05965	0	0	Limnephilidae	Chaetopteryx atlantica	1	11.9266
OTU-152	IBITR425-20	INV05967	0	0	Ptilocolepidae	Ptilocolepus granulatus	1	14.0097
OTU-153	IBITR430-20	INV05973	0.152905	0.152905	Brachycentridae	Micrasema minimum	2	8.8685
OTU-153	IBITR431-20	INV05974	0.152905	0.152905	Brachycentridae	Micrasema minimum	2	8.8685
OTU-154	IBITR435-20	INV06484	0	0	Brachycentridae	Micrasema longulum	1	11.315

## Sheet: caption
Distance Model: Pairwise Distance
Marker: COI-5P
Labels: Sample ID, Family, Taxon
Deletion Method: Pairwise Deletion
Alignment: BOLD Aligner (Amino Acid based HMM)
Filters Applied: ≥ 100bp only
Generate OTUs from identified and unidentified sequences using the REfined Single Linkage algorithm (RESL – Ratnasingham & Hebert 2013). Sequences will be assigned to OTUs independent of the BIN registry
